1 **Title:** Inhibiting endoplasmic reticulum stress decreases tumor burden in a mouse  
2 model for hepatocellular carcinoma.

3

4 **Authors:** Natasa Pavlovic<sup>1</sup>, Carlemi Calitz<sup>1</sup>, Kessarín Thanapirom<sup>3</sup>, Giuseppe  
5 Mazza<sup>3</sup>, Krista Rombouts<sup>3</sup>, Pär Gerwins<sup>1,2</sup> and Femke Heindryckx<sup>1</sup>

6

7 **Affiliations:**

8 *(1) Department of Medical Cell Biology, Uppsala University, Uppsala, Sweden*

9 *(2) Department of Radiology, Uppsala University Hospital, Uppsala, Sweden*

10 *(3) Regenerative Medicine & Fibrosis Group, Institute for Liver and Digestive Health,  
11 University College London (UCL), London, UK*

12

13 **Running title:** Inhibiting ER-stress decreases hepatocellular carcinoma

14

15 **Impact statement:** IRE1 $\alpha$  is an important mediator in the communication between  
16 stellate cells and cancer cells and components of the ER-stress pathway may be  
17 therapeutically relevant for liver cancer.

18

19 **Keywords:** Endoplasmic reticulum stress; fibrosis; hepatic stellate cells; IRE1 $\alpha$ ;  
20 tumor-stroma interactions;

21

22 **Abbreviations:**  $\alpha$ SMA -  $\alpha$ -smooth muscle actin; DEN – diethylnitrosamine; DMEM -  
23 Dulbecco modified eagle medium; ELISA - Enzyme-Linked immune Sorbent Assay,  
24 ER - Endoplasmic reticulum; FBS - fetal bovine serum; HCC - Hepatocellular

1 carcinoma, H&E - Haematoxylin-eosin; TBS - tris-buffer saline; TGF $\beta$  - tumor growth  
2 factor  $\beta$ ; UPR - unfolded protein response;

3

4 **Corresponding author:** Femke Heindryckx, Department of Medical Cell Biology,  
5 BOX 571, Husargatan 3, 75123 Uppsala, Sweden. Phone: +46768542025 Email:  
6 [femke.heindryckx@mcb.uu.se](mailto:femke.heindryckx@mcb.uu.se)

7

8

## 9 **ABSTRACT**

10 Hepatocellular carcinoma (HCC) is a liver tumor that arises in patients with cirrhosis.  
11 Hepatic stellate cells are key players in the progression of HCC, as they create  
12 a fibrotic micro-environment and produce growth factors and cytokines that enhance  
13 tumor cell proliferation and migration. We assessed the role of endoplasmic reticulum  
14 (ER) stress in the cross-talk between stellate cells and HCC-cells. Mice with a fibrotic  
15 HCC were treated with the IRE1 $\alpha$ -inhibitor 4 $\mu$ 8C, which reduced tumor burden and  
16 collagen deposition. By co-culturing HCC-cells with stellate cells, we found that HCC-  
17 cells induce ER-stress in stellate cells, thereby contributing to their activation. Inhibiting  
18 IRE1 $\alpha$  blocked stellate cell activation, which inhibited tumor cell proliferation and  
19 migration in different *in vitro* 2D and 3D co-cultures. Our results suggest that IRE1 $\alpha$  is  
20 an important mediator in the communication between stellate cells and cancer cells  
21 and components of the ER-stress pathway may be therapeutically relevant for HCC-  
22 patients.

23

## 24 **INTRODUCTION**

25 Hepatocellular carcinoma (HCC) is a primary liver tumor that typically arises in a  
26 background of chronic liver disease and cirrhosis (1). One of the key players in the



1 progression of cirrhosis to HCC is the hepatic stellate cell, which activates during liver  
2 damage and differentiates towards a contractile myofibroblast-like cell responsible for  
3 the deposition of extracellular matrix proteins (ECM) such as collagen (2). Activated  
4 stellate cells can induce phenotypic changes in cancer cells through the production of  
5 growth factors and cytokines that stimulate tumor cell proliferation and induce a pro-  
6 metastatic phenotype (3). One of the key factors in the cross talk between tumor cells  
7 and stellate cells is tumor growth factor beta (TGF $\beta$ ) (4-6). Malignant hepatocytes  
8 secrete high levels of TGF $\beta$ , which can contribute to the activation of stellate cells in  
9 the nearby stroma. These activated stellate cells are then responsible for the  
10 deposition of ECM. Several of the ECM components such as proteoglycans, collagens,  
11 laminin, and fibronectin interact with tumor cells and cells in the stroma, which can  
12 directly promote cellular transformation and metastasis (7, 8). The ECM can also act  
13 as a reservoir for growth factors and cytokines, which can be rapidly released to  
14 support the tumor's needs. In addition, activated stellate cells contribute to a highly  
15 vascularized tumor micro-environment, by secreting pro-angiogenic molecules and by  
16 recruiting pro-angiogenic (and pro-tumoral) myeloid and lymphoid derived cell types  
17 (9). By constricting the hepatic microvasculature, they also cause hypoxia, which  
18 contributes to the angiogenic switch and can induce a more aggressive tumor  
19 phenotype (10). It is therefore not surprising that tumor cells actively secrete growth  
20 factors (such as TGF $\beta$ ) to induce activation and migration of stellate cells, which  
21 creates a fibrotic environment that further supports and enhances tumor progression  
22 (2, 11, 12). Since activated stellate cells play an essential role in the onset and  
23 progression of HCC, blocking their activation has been proposed as a potential therapy  
24 for patients with HCC (13). One strategy to block stellate cell activation, is by targeting  
25 the unfolded protein response (UPR).

1  
2 The unfolded protein response serves to cope with misfolded or unfolded proteins in  
3 the ER in an attempt to restore protein folding, increase ER-biosynthetic machinery  
4 and maintain cellular homeostasis (14). It can exert a cytoprotective effect by re-  
5 establishing cellular homeostasis, while apoptotic signaling pathways will be activated  
6 in case of severe and/or prolonged ER-stress (15). The presence of misfolded proteins  
7 is sensed via 3 transmembrane proteins in the ER: IRE1 $\alpha$ , PERK and ATF6a. Actors  
8 of the ER-stress pathways have been described to play a role in the progression of  
9 solid tumors, such as breast cancer (16), colon cancer (17) and HCC (18). Activation  
10 of the UPR has also been shown to affect different fibrotic diseases (19), including  
11 non-alcoholic fatty liver disease (20-22), hepatitis B-induced carcinogenesis (23) and  
12 biliary cirrhosis (24). We have previously shown that inhibiting the IRE1 $\alpha$ -branch of the  
13 UPR-pathway using 4 $\mu$ 8C, blocks TGF $\beta$ -induced activation of fibroblasts and stellate  
14 cells *in vitro* and reduces liver fibrosis *in vivo* (25). In the current study, our aim was to  
15 define the role of ER-stress in the cross-talk between hepatic stellate cells and tumor  
16 cells in liver cancer. We show that pharmacologic inhibition of the IRE1 $\alpha$  signaling  
17 pathway decreases tumor burden in a chemically induced mouse model for HCC.  
18 Using several *in vitro* co-culturing methods, we identified that tumor cells induce ER-  
19 stress in hepatic stellate cells. Blocking ER-stress in these hepatic stellate cells  
20 prevents their activation and decreases proliferation and migration of tumor cells co-  
21 cultured with hepatic stellate cells.

22

## 23 **MATERIAL AND METHODS**

24 *Mouse model*

1 A chemically induced mouse model for HCC was used, as previously described (26,  
2 27). Briefly, 5-week-old male sv129 mice received intraperitoneal injections once per  
3 week with 35mg/kg bodyweight DEN diluted in saline. From week 10, mice were  
4 injected twice per week with 10µg/g bodyweight 4µ8C (Sigma) in saline. After 25  
5 weeks mice were euthanized and samples were taken for analysis. This method was  
6 approved by the Uppsala ethical committee for animal experimentation (C95/14). Each  
7 group contained 8 mice, which generates enough power to pick up statistically  
8 significant differences between treatments, as determined from previous experience (  
9  
10 26, 27). Mice were assigned to random groups before treatment.

11

#### 12 *Olink multiplex proximity extension assay*

13 Liver samples were homogenized in ice-cold RIPA containing protease inhibitors  
14 (Sigma Aldrich). Homogenates were kept on ice for 20–30 min, whilst mixing vigorously  
15 to enhance disruption of the cell membranes. The homogenates were centrifuged (20  
16 min, 13 000 rpm, 4°C) and supernatant containing protein was collected. Supernatant  
17 was stored at -20°C until protein measurement. Protein concentration was measured  
18 using the BCA kit (ThermoFisher) and all samples were diluted to 1 mg/mL protein in  
19 RIPA. Samples from 3 biological replicates per group were analyzed with a multiplex  
20 proximity extension assay for ninety-two biomarkers in the murine exploratory panel  
21 (Olink Bioscience, Uppsala, Sweden) (28). Samples were loaded random on the assay  
22 plates. Raw data was deposited in Dryad (29).

23

24

#### 25 *Cell culture and reagents*

1 The HCC-cell lines (HepG2, ATCC and Huh7, kind gift from Dilruba Ahmed, Karolinska  
2 Institute) and hepatic stellate cell-line LX2 (Sigma-Aldrich, Darmstadt, Germany) were  
3 cultured at 37°C with 5% CO<sub>2</sub> in Dulbecco modified eagle medium (DMEM)  
4 supplemented with 10% fetal bovine serum (FBS) (ThermoFisher, Stockholm,  
5 Sweden). No FBS was used during starvation and stimulation with growth factors. Cells  
6 were detached using trypsin-EDTA (ThermoFisher), re-suspended in growth medium  
7 and plated at a density of 5x10<sup>3</sup> cells/cm<sup>2</sup>. Cells were allowed to attach and left  
8 undisturbed for 8h before being starved for 16h. Afterwards, fresh starvation medium  
9 containing indicated growth factors or substances were added. Cells were exposed for  
10 48h to 100µM 4µ8C (Sigma-Aldrich) or 10µM SB-431541 (Tocris, Abingdon, UK) as  
11 previously described (25). For transwell co-culturing experiments, cells were grown on  
12 12-well Corning Tissue Culture-plates with transwell inserts (Sigma-Aldrich) with  
13 0,4µm-pore size, allowing the exchange of soluble factors, but preventing direct cell  
14 contact.

15  
16 3D-tumor spheroids were generated on 96-well ultra-low attachment plates (Sigma-  
17 Aldrich) (30). After 6 days, spheroids had reached approximately 1mm<sup>2</sup> and 4µ8C was  
18 added. Proliferation was monitored during the subsequent 4 days. Tumor spheroids  
19 were retrieved from the plates after 10 days.

20  
21 Fluorescent labeling of cells was done in imaging experiments by using CellTracker  
22 (ThermoFisher), according to manufacturer's instructions. Cell pellets were incubated  
23 30 minutes with 1µM of CellTracker™ Red CMTPX or 1µM of CellTracker™ Green  
24 CMFDA. Cells were washed twice in PBS prior to co-culturing.

25

## 1 *Human liver scaffold decellularization and cell culture usage*

2 Human healthy livers were obtained under the UCL Royal Free BioBank Ethical  
3 Review Committee (NRES Rec Reference: 11/WA/0077) approval. Informed consent  
4 was obtained for each donor and confirmed via the NHSBT ODT organ retrieval  
5 pathway (31). Liver 3D-scaffolds, were decellularized, sterilized and prepared for cell  
6 culture use as preciously described (31). LX2 and HepG2-cells, as either mono-  
7 cultures or mixed co-culture, were released on top of each scaffold as  $2.5 \cdot 10^5$  cells in  
8  $20 \mu\text{L}$  (32).

9

## 10 *Proliferation*

11 Cell proliferation was monitored via a resazurin reduction assay. A 1%-resazurin  
12 solution was added in 1/80 dilution to the cells and incubated for 24h, after which  
13 fluorescent signal was measured with a 540/35 excitation filter and a 590/20 emission  
14 filter on a Fluostar Omega plate reader.

15

## 16 *Transfections*

17 Nucleofection with  $0,1 \mu\text{M}$  siRE1 $\alpha$  (s200432, ThermoFisher), or  $0,1 \mu\text{M}$  siCtrl  
18 (4390843, ThermoFisher) was done using Amaxa Nucleofector program S-005 in  
19 Ingenio electroporation solution (Mirus Bio LLC, Taastrup, Denmark).

20

## 21 *Migration and chemotaxis*

22 Non-directional migration was assessed using a scratch wound assay on fluorescently  
23 labelled LX2-cells and HepG2-cells. Scratch size was measured by analyzing light  
24 microscopy images in ImageJ, using the MRI Wound Healing Tool plug-in

1 ([http://dev.mri.cnrs.fr/projects/imagej-macros/wiki/Wound\\_Healing\\_Tool](http://dev.mri.cnrs.fr/projects/imagej-macros/wiki/Wound_Healing_Tool)). Image

2 analysis was done in ImageJ.

3 Directional migration was assessed using CellDirector-devices (GradienTech,  
4 Uppsala, Sweden). HepG2 and LX2-cells were labelled with CellTracker-dye and left  
5 to adhere overnight in the CellDirector-devices. Non-adherent cells were washed away  
6 with DMEM and cells were starved for 1h prior to commencing experiments. A gradient  
7 of 0 to 10% FBS was created with a flow rate of 1.5  $\mu$ l/minute. Cell movement was  
8 recorded using an Axiovision 200M microscope (Zeiss, Stockholm, Sweden) for 4h  
9 and tracked using Axiovision software (Zeiss). During the assay cells were kept at 37°C  
10 with 5% CO<sub>2</sub>.

11

### 12 *Quantitative RT-PCR of mRNA*

13 RNA was isolated from tissue or cell culture using the EZNA RNA isolation Kit (VWR,  
14 Spånga, Sweden) or using TRIzol reagent and RNeasy Universal Mini Kit (Qiagen,  
15 Sollentuna, Sweden) for human liver scaffolds (31). RNA-concentration and purity  
16 were evaluated using Nanodrop. Afterwards, 500ng of mRNA was reverse transcribed  
17 using iScript cDNA synthesis kit (Bio-rad, Solna, Sweden). Amplifications were done  
18 using primers summarized in supplementary table 1. mRNA-expression was  
19 normalized to *18S*, *GAPDH* and/or *TBP1*. Fold change was calculated via the delta-  
20 delta-CT method, by using the average CT value of 3 technical replicates.

21 The procedure to detect the spliced and unspliced isoforms of XBP1 was done by  
22 digesting RT-PCR product with the restriction enzyme *Pst*-I (ThermoFisher). This  
23 cleaves unspliced-XBP1 containing the *Pst*-I-cleavage site (CTGCA<sup>^</sup>G), but  
24 leaves the spliced isoform intact. The digestion reaction was stopped after 18h by 0,5M  
25 EDTA (pH 8.0) and run on a 1,5% agarose gel for 1h at 180V.

1

## 2 *Stainings and immunocytochemistry*

3 Tissue samples were fixed in 4% paraformaldehyde for 24h and subsequently  
4 embedded in paraffin. Cells and tumor spheroids were fixed for 10 minutes in 4%  
5 paraformaldehyde and stored at 4°C. Paraffin embedded tissue samples were cut at  
6 5µm and dried overnight. Sections were de-paraffinized and rehydrated prior to  
7 staining. Collagen was stained using the picosirius red staining with an incubation time  
8 of 30 minutes, followed by 10 minutes washing in distilled water. Haematoxylin-eosin  
9 (H&E) staining was done according to standard practice. Images were acquired using  
10 a Nikon eclipse 90i microscope equipped with a DS-Qi1Mc camera and Nikon plan  
11 Apo objectives. NIS-Elements AR 3.2 software was used to save and export images.  
12 Quantification of collagen deposition was performed blindly with ImageJ software by  
13 conversion to binary images after color de-convolution to separate Sirius Red staining,  
14 as previously described (33).

15

16 Paraformaldehyde fixed cells and spheroids were washed with tris-buffer saline (TBS)  
17 and blocked for 30 minutes using 1% bovine serum albumin in TBS + 0,1% Tween.  
18 For liver tissue, antigen retrieval was done at 95°C in sodium citrate buffer and  
19 endogenous mouse IgG was blocked using a rodent blocking buffer (ab127055,  
20 abcam) following manufacturer's guidelines. Blocking was followed by an overnight  
21 incubation at 4°C with antibodies against  $\alpha$ -smooth muscle actin ( $\alpha$ SMA) (clone 1A4,  
22 Sigma), Bip (ab21685, abcam) or p-IRE1 $\alpha$  (PAB12435, Abnova). A 40-minute  
23 incubation was used for the secondary antibody (Rabbit anti-mouse Alexa Fluor-488  
24 or donkey anti-rabbit Alexa Fluor-633) and cell nuclei were stained with Hoechst for 8  
25 minutes. Images were taken using an inverted confocal microscope (LSM 700, Zeiss)

1 using Plan-Apochromat 20× objectives and the Zen 2009 software (Zeiss). The  
2 different channels of immunofluorescent images were merged using ImageJ software.  
3 Quantifications were done blindly with ImageJ software by conversion to binary images  
4 for each channel and automated detection of staining on thresholded images using a  
5 macro.

6  
7 For histological and immunohistochemical analysis of the human liver scaffolds, 4µm  
8 slides were cut from paraffin embedded blocks. The sections were de-paraffinized and  
9 rehydrated prior to staining. To retrieve the antigens, slides were microwaved at high  
10 power for 5 minutes in pre-heated 10 mM sodium citrate buffer, and subsequently left  
11 to cool down to room temperature. Following this, a single wash was performed in 100  
12 mM Glycine in PBS, after which the slides were blocked for 2h in TNB Blocking  
13 Reagent (Ancillary Products, FP1020). Slides were then incubated for 2h in the  
14 following antibodies; Ki67 (1:100; eBioscience™, SolA15), and EPCAM (1:100;  
15 Abcam, ab71916). A 1h incubation was used for the secondary antibody (goat anti-rat  
16 Alexa Fluor 555 and Rabbit anti-mouse Alexa Fluor 488). Sections were mounted with  
17 Fluoromount-G™, with DAPI (Invitrogen, 00-4959-52). Images were taken with using  
18 an inverted confocal microscope (LSM 780, Zeiss) using Plan-Apochromat 10×  
19 objectives and the Zen 2009 software (Zeiss).

20

### 21 *Enzyme-Linked immune Sorbent Assay (ELISA)*

22 Medium samples from cells and from the engrafted scaffolds were used to measure  
23 TGFβ using ELISA (88-8350-22, ThermoFisher), following manufacturer's guidelines.  
24 The average from 2 technical replicates were used for calculations.

25



## 1 *SDS-PAGE and western blot*

2 Protein lysates in lysis buffer were mixed with 2x laemmli buffer and heated to 95°C  
3 for 5 minutes before being loaded onto a 10% polyacrylamide gel. After separation,  
4 the proteins were transferred to an Immobilon-FI membrane (Millipore). The membrane  
5 was blocked using the Odyssey blocking buffer (Licor) diluted 1:4 in PBS, and then  
6 incubated with primary and secondary antibodies. After primary and secondary  
7 antibody incubation the membrane was washed 3x15 minutes in PBS-T (Phosphate  
8 buffered saline (Gibco), 0.1% Tween-20). Primary antibodies used were Bip (ab21685,  
9 abcam), p-IRE1 $\alpha$  (PAB12435, Abnova) or vinculin (14-9777-82, ThermoFisher) all  
10 added in blocking buffer with 0.1% Tween-20. Secondary antibodies used were: goat-  
11 anti-mouse alexa 680 (Invitrogen) and goat-anti-rabbit IRDye 800 (Rockland) 1:20 000  
12 diluted in blocking buffer with 0.1% Tween-20 and 0.01% SDS. All incubations were  
13 carried out at room temperature for 1h or overnight at 4°C. The membranes were  
14 scanned using an Odyssey scanner (LI-COR Biotechnology) and band intensities  
15 quantified using the Odyssey 2.1 software and normalized to the vinculin signal in each  
16 sample.

17

## 18 *Gene-set enrichment analysis*

19 Gene expression profiles of HCC with a fibrous stroma and without fibrous stroma was  
20 accessed through PubMed's Gene Expression Omnibus via accession number  
21 GSE31370 (34). A gene-set containing 79 proteins involved in the unfolded protein  
22 response was downloaded from The Harmonizome (35) and GSEA software was used  
23 to perform a gene-set enrichment assay (36).

24

## 25 *Human protein atlas*

1 Images from biopsies from HCC patients stained with antibodies against WIPI1 (37),  
2 SHC1 (38), PPP2R5B (39) and BiP (40) were obtained through the Human Protein  
3 Atlas (41).

4

#### 5 *Statistics*

6 Data are presented as mean  $\pm$  s.e.m. Statistical significance was determined using an  
7 unpaired, two-tailed Student's T-test or one-way analysis of variance (ANOVA)  
8 followed by Tukey's multiple comparison test. Survival curves were generated with the  
9 Kaplan-Meier method and statistical comparisons were made using the log-rank  
10 method. P-values  $<0.05$  were considered statistically significant. *In vitro* experiments  
11 were done in at least 3 biological replicates, which we define as parallel measurements  
12 of biologically distinct samples taken from independent experiments. Technical  
13 replicates we define as loading the same sample multiple times on the final assay. The  
14 *in vivo* experiments were done on at least 5 independent animals. Outliers were kept  
15 in the analyses, unless they were suspected to occur due to technical errors, in which  
16 case the experiment was repeated.

17

## 18 **RESULTS**

### 19 ***Pharmacological inhibition of IRE1 $\alpha$ reduces tumor burden in a chemically*** 20 ***induced mouse model for HCC***

21 Hepatocellular carcinoma was induced in mice by weekly injections with  
22 diethylnitrosamine (DEN) for 25 weeks (26). From week 10, IRE1 $\alpha$ -endonuclease  
23 activity was pharmacologically inhibited with 4 $\mu$ 8C. Histological analysis of liver tissue  
24 confirmed presence of liver tumors in a fibrotic background (Figure 1A). Treatment with  
25 4 $\mu$ 8C significantly reduced tumor burden (Figure1B), as measured on H&E-stained

1 liver slides (Figure 1A). Stellate cell activation and liver fibrosis was quantified by Sirius  
2 Red staining (Figure 1A and 1C) and immunohistochemical staining with  $\alpha$ SMA-  
3 antibodies (Figure 1A and 1D) on liver sections. Mice with HCC had a significant  
4 increase in the percentage of collagen (Figure 1C) and  $\alpha$ SMA-staining (Figure 1D),  
5 compared to healthy mice. Treatment with 4 $\mu$ 8C restored collagen (Figure 1C) and  
6  $\alpha$ SMA-levels (Figure 1D and Figure 1E) to a similar level as healthy livers. mRNA  
7 expression levels of PCNA were determined on tumor nodules and surrounding non-  
8 tumor stromal tissue (Figure 1E). As expected, proliferation of cells was increased  
9 within the tumor itself, compared to the levels seen in healthy liver tissue and stromal  
10 tissue. Treatment with 4 $\mu$ 8C significantly decreased the levels of PCNA mRNA  
11 expression within the tumor, suggesting a decrease in tumor cell proliferation. A  
12 proteomics array using the Olink Mouse Exploratory assay revealed that DEN-induced  
13 murine tumors had a significantly increased protein expression of 20 oncogenic  
14 proteins compared to healthy controls (Figure 1F and table 1). In the 4 $\mu$ 8C-treated  
15 group, only 11 oncogenic proteins were increased compared to healthy controls  
16 (Figure 1F and table 1). Treatment with 4 $\mu$ 8C also significantly reduced the expression  
17 of two HCC promoters, Prdx5 and DDah1 (Figure 1F and table 1).

18

19 ***Markers of the unfolded protein response are upregulated in HCC and mainly***  
20 ***located in the tumor stroma.***

21 mRNA-levels of the ER-stress-chaperone BiP were measured in tumor and  
22 surrounding non-tumor tissue of mice with DEN-induced HCC (Supplementary figure  
23 1A). BiP-mRNA-expression was increased in the surrounding non-tumor tissue of  
24 DEN-induced mice, while there was no difference within the tumor, compared to  
25 healthy controls. Western blot confirmed the increase of BIP-protein expression in

1 DEN-induced livers, which was reduced after treatment with 4 $\mu$ 8C (Supplementary  
2 figure 1 B). Co-staining of liver tissue with  $\alpha$ SMA and p-IRE1 $\alpha$ -antibodies  
3 (Supplementary figure 1C and D) or BiP-antibodies (Supplementary figure 1E) in  
4 untreated mice with HCC, revealed that expression of ER-stress markers was mainly  
5 localized within activated stellate cells in the liver.

6 A gene-set enrichment assay on microarray data from HCC-patients with fibrotic  
7 septae and without fibrotic septae showed an increase of genes involved in the UPR  
8 in the fibrotic HCC samples compared to non-fibrous HCC (supplementary figure 2A).  
9 Several actors of the IRE1 $\alpha$ -branch of the UPR are amongst the genes that contribute  
10 to the core-enrichment of this analysis (table 2). Immunohistochemical staining of liver  
11 biopsies from HCC-patients further confirmed presence of IRE1 $\alpha$ -mediated ER-stress  
12 markers BiP, PPP2R5B, SHC1 and WIP11 localized in the fibrotic scar tissue and near  
13 hepatic blood vessels (Supplementary figure 2B). In addition, increased expression of  
14 these markers was significantly correlated with poor survival in patients with liver  
15 cancer (Supplementary figure 2C).

16

### 17 ***Tumor cells secrete factors that induce ER-stress in hepatic stellate cells***

18 Hepatic stellate cell-lines (LX2) and HCC-cell lines (HepG2 and Huh7) were grown in  
19 different compartments using a transwell assay. This confirmed that tumor cells  
20 secrete factors that increase mRNA-expression of CHOP (Figure 2A), spliced XBP1  
21 (Figure 2B and D) and BiP (Figure 2C), as well as protein expression of p-IRE1 $\alpha$   
22 (Figure 2E) in hepatic stellate cells co-cultured with tumor cells, indicating the presence  
23 of ER-stress. This also led to their activation, as measured by mRNA-expression of  
24  $\alpha$ SMA (Figure 2F) and collagen (Figure 2G) in LX2-cells grown with HepG2 or Huh7

1 cells in a transwell assay. The mRNA-expression of  $\alpha$ SMA and collagen was restored  
2 to baseline levels when 4 $\mu$ 8C was added to the transwell co-cultures.

3 De-cellularised human liver 3D-scaffolds were engrafted with hepatic stellate cells  
4 (LX2) and tumor cells (HepG2). Sirius red staining and H&E staining confirmed that  
5 that LX2-cells and HepG2-cells successfully engrafted the collagen-rich matrix of the  
6 decellularized human liver scaffolds (Figure 3A). Engrafting both LX2-stellate cells and  
7 HepG2-cancer cells led to a significant increase of mRNA-expression of collagen, BiP  
8 and spliced XBP1 (Figure 3B) compared to scaffolds that were only engrafted with  
9 LX2-cells. Adding 4 $\mu$ 8C significantly decreased mRNA expression of collagen and BiP-  
10 mRNA-expression in the LX2 and HepG2 co-cultured scaffolds (Figure 3B).

11 Tumor cells are important sources of TGF $\beta$ , which is a known activator of stellate cells.  
12 Surprisingly, measuring TGF $\beta$  in mono-cultures lead to undetectable levels of TGF $\beta$  in  
13 Huh7-cells and low-levels in HepG2-cells (Supplementary figure 3A). These levels  
14 increased when LX2-cells were added to the co-cultures (Supplementary figure 3A).  
15 Engrafting both LX2-stellate cells and HepG2-cancer cells in the human liver scaffolds,  
16 slightly increased TGF $\beta$ -levels in the medium compared to scaffolds engrafted by only  
17 one cell type, but overall no significant differences were seen (Supplementary figure  
18 3B). It is important to note that the baseline TGF $\beta$ -levels were markedly higher in the  
19 mono-cultured scaffolds, compared to the levels measured in cells grown in a standard  
20 2D *in vitro* set-up (Supplementary figure 3A). Blocking TGF $\beta$ -receptor signaling with  
21 SB-431541 significantly reduced mRNA-expression of ER-stress markers CHOP  
22 (Supplementary figure 3C), spliced XBP1 (Supplementary figure 3D-E) and BiP  
23 (Supplementary figure 3F) in stellate cells co-cultured with tumor cells using transwells.  
24 Adding a TGF $\beta$ -receptor-inhibitor to stellate cell – tumor cell co-cultures also reduced

1 stellate cell activation, as measured by mRNA-expression of  $\alpha$ SMA (Supplementary  
2 figure 3G) and collagen (Supplementary figure 3H). This indicates that TGF $\beta$ -secretion  
3 by tumor cells could be responsible for activating stellate cells and for inducing the  
4 UPR.

5

6 ***Pharmacological inhibition of IRE1 $\alpha$  decreases tumor cell proliferation in stellate***  
7 ***cell – tumor cell co-cultures***

8 In transwell co-culturing assays, we found that co-culturing HepG2 or Huh7-tumor cells  
9 with LX2-stellate cells significantly increased PCNA-mRNA-expression in HepG2 and  
10 Huh7-tumor cell lines (Figure 4A). Adding 4 $\mu$ 8C significantly decreased mRNA-  
11 expression of PCNA in Huh7-cells grown in a transwell co-culture with LX2-cells, while  
12 not affecting PCNA-expression in tumor cell mono-cultures (Figure 4A). PCNA-levels  
13 in HepG2-LX2 transwell co-cultures were slightly decreased, but this was not  
14 significant. Proliferation was measured 24h after exposure to 4 $\mu$ 8C in tumor cells  
15 (HepG2 and Huh7) grown as mono-cultures and in co-culture with LX2-stellate cells.  
16 While 4 $\mu$ 8C induced a significant increase in proliferation of HepG2-monocultures, no  
17 difference was seen in LX2-monocultures and a significant decrease was seen in the  
18 HepG2-LX2 co-cultures (Figure 4B). In the Huh7 tumor cell line, 4 $\mu$ 8C significantly  
19 decreased cell number compared to untreated controls and a similar reduction was  
20 seen in the Huh7-LX2 co-cultures (Figure 4C). Immunohistochemical staining with  
21 antibodies against Epcam and Ki67 show that the effect on proliferation is mainly  
22 localized in the tumor cell population of these co-cultures (Figure 4D).

23 3D-spheroids were generated using tumor cells alone (HepG2 or Huh7) or in  
24 combination with LX2-cells. While the HepG2-spheroids experienced a lower

1 proliferation rate when co-cultured with LX2 stellate cells (Figure 4E), there was no  
2 difference in proliferation between spheroid-monocultures and spheroid-co-cultures in  
3 the Huh7-cells (Figure 4F). Treatment with 4 $\mu$ 8C significantly decreased proliferation  
4 of the tumor spheroids consisting of tumor cells (Huh7 or HepG2) and stellate cells  
5 (LX2), while tumor spheroid monocultures were not affected by 4 $\mu$ 8C. Similarly, PCNA-  
6 mRNA-expression significantly increased in human liver scaffolds engrafted with  
7 HepG2 and LX2-cells, compared to those engrafted with only tumor cells (Figure 5A).  
8 Treatment with 4 $\mu$ 8C significantly decreased PCNA-mRNA-expression in the  
9 LX2+HepG2 liver scaffolds, whilst not affecting those engrafted with only tumor cells.  
10 This further confirms our hypothesis that 4 $\mu$ 8C affects tumor cell proliferation indirectly,  
11 namely by blocking the activation of stellate cells and thus impairing the interaction  
12 between tumor and stroma.

13 We measured the mRNA-expression of hepatocyte-nuclear-factor-4-alpha (Hnf4- $\alpha$ ),  
14 which is a liver function marker that is correlated to a favorable outcome for HCC-  
15 patients (42). While co-engraftment of LX2 and HepG2-cells in the liver scaffolds only  
16 lead to a marginal increase of Hnf4- $\alpha$ , treatment with 4 $\mu$ 8C significantly increased  
17 Hnf4- $\alpha$ -mRNA-expression, thus suggesting an overall improvement of liver function  
18 and possibly improved prognosis (Figure 5B). Immunohistochemical staining of Epcam  
19 and ki67, showed that the HCC-cells have successfully engrafted the entire surface of  
20 the scaffolds and that 4 $\mu$ 8C decreases proliferation (Figure 5C).

21  
22 ***Pharmacological inhibition of IRE1 $\alpha$  decreases tumor cell migration in stellate***  
23 ***cell – tumor cell co-cultures***

24 Co-culturing HepG2 and Huh7-tumor cells with LX2-cells in the transwell assays  
25 significantly increased mRNA-expression of the pro-metastatic marker MMP9 in

1 HepG2-cells (Figure 6A) and MMP1 in HepG2 and Huh7-cells (Figure 6B). Adding  
2 4 $\mu$ 8C significantly decreased the mRNA-expression of MMP1 in HepG2+LX2 and  
3 Huh7+LX2 transwell co-cultures, while a non-significant decrease of MMP9 mRNA-  
4 expression was seen in Huh7+LX2 transwell co-cultures. To assess whether this  
5 reduction in mRNA-expression of pro-metastatic markers has a functional effect on cell  
6 migration, a scratch wound assay was performed on confluent monolayers of mono-  
7 cultures (HepG2 or LX2) or tumor cell (HepG2) – stellate cell (LX2) co-cultures (Figure  
8 6C). To visualize closing of the scratch wound by each individual cell type, cells were  
9 fluorescently labeled using CellTracker Green (tumor cells) or CellTracker Red (LX2  
10 stellate cells) (Figure 6D). Tumor-stellate cell co-cultures were the most efficient to  
11 close the scratch wound (Figure 6E). This was significantly inhibited when co-cultures  
12 were treated with 4 $\mu$ 8C. We also observed a direct effect of 4 $\mu$ 8C on LX2 and HepG2-  
13 migration, since treatment with 4 $\mu$ 8C lead to a significant reduction in wound closure  
14 after 24h, compared to untreated controls. It is important to note that traditional scratch  
15 wound assays cannot distinguish between proliferation and migration (43). To  
16 overcome this limitation (44), we counted the individual number of cells in the middle  
17 of the wound area (Figure 6F and G). No significant difference was seen between  
18 HepG2 or LX2-cells within the wound area of HepG2-LX2 co-cultures after 24 hours  
19 (Figure 6F). However, 4 $\mu$ 8C-treatment significantly decreased migration of HepG2-  
20 cells and LX2-cells inside the scratch wound in co-cultures, while not affecting mono-  
21 cultures (Figure 6G).

22 Metastasis is usually a result of directed migration and chemotaxis toward physical  
23 and biochemical gradients within the tumor stroma (45). We used a microfluidic-based  
24 device for studying cell migration towards a stable gradient of chemotactic factors,  
25 such as FBS. 4 $\mu$ 8C significantly decreased total migration (Supplementary figure 4A-



1 C) and directional migration towards FBS (Supplementary figure 4B and D) of HepG2-  
2 cells co-cultured with LX2-cells. Similarly, inhibition of ER-stress with 4 $\mu$ 8C  
3 significantly decreased total migration (Supplementary figure 4E and G) and directional  
4 migration towards FBS (Supplementary figure 4F and H) of LX2-cells co-cultured with  
5 HepG2-cells. Overall, these data suggest that stellate cells increase proliferation and  
6 pro-metastatic potential of tumor cells and blocking the IRE1 $\alpha$ -RNase activity  
7 decreases tumor cell proliferation and migration.

8

### 9 ***Silencing of IRE1 $\alpha$ in stellate cells decreases tumor cell proliferation and*** 10 ***migration in co-cultures***

11 To investigate whether the effect of blocking IRE1 $\alpha$  is due to a direct effect on the  
12 tumor cells or because of an indirect effect via stellate cells, we transfected the stellate-  
13 line LX2 with an IRE1 $\alpha$ -siRNA prior to co-culturing them in a transwell assay with  
14 HepG2-cells. Transfection efficiency was determined via qPCR and showed a 50%  
15 reduction in the IRE1 $\alpha$ -mRNA-expression (Figure 7A) compared to non-transfected  
16 (Ctrl) or mock-transfected (Scr) controls. In the transwell co-culturing assay, we found  
17 that silencing IRE1 $\alpha$  in the LX2-cells significantly decreased PCNA-mRNA-expression  
18 in HepG2-cells (Figure 7B). Silencing IRE1 $\alpha$  in the LX2-cells lead to a significant  
19 reduction of proliferation in LX2-HepG2 co-cultures (Figure 7C) and LX2-HepG2  
20 spheroids (Figure 7D). Immunocytochemical staining with  $\alpha$ SMA-antibodies (Figure  
21 7E), confirmed a significant reduction of  $\alpha$ SMA after si-IRE1 $\alpha$ -transfection of LX2-  
22 stellate cells in HepG2-LX2 spheroid co-cultures (Figure 7F). A scratch wound assay  
23 on HepG2-LX2 co-cultures verified that silencing of IRE1 $\alpha$  in LX2-cells significantly  
24 reduced wound closure compared to non-transfected and mock-transfected stellate  
25 cells (Figure 7G - H). Overall, these data confirm that blocking the IRE1 $\alpha$ -pathway in

1 hepatic stellate cells decreases proliferation and pro-metastatic potential of tumor  
2 cells.

3

#### 4 **DISCUSSION**

5 There is increasing evidence that ER-stress and activation of the UPR play an  
6 essential role during hepatic inflammation and chronic liver disease. We have  
7 previously shown that inhibition of IRE1 $\alpha$  prevents stellate cell activation and reduces  
8 liver cirrhosis *in vivo* (25). In this report, we further define a role of ER-stress and the  
9 UPR in the interaction between tumor cells and hepatic stellate cells. We also show  
10 that IRE1 $\alpha$  could form a valuable therapeutic target to slow down the progression of  
11 hepatocellular carcinoma.

12

13 Activated stellate cells play an important role in promoting tumorigenesis and tumors  
14 are known to secrete cytokines such as TGF $\beta$ , which induce myofibroblast activation  
15 and creates an environment that sustains tumor growth (46). Since over 80% of HCC  
16 arises in a setting of chronic inflammation associated with liver fibrosis, targeting the  
17 fibrotic tumor micro-environment is often proposed as a valuable therapeutic strategy  
18 for HCC-patients (2). We and others have shown that ER-stress plays an important  
19 role in stellate cell activation and contributes to the progression of liver fibrosis (25, 47-  
20 49). The mechanisms by which the UPR promotes stellate cell activation have been  
21 attributed to regulating the expression of c-MYB (25), increasing the expression of  
22 SMAD-proteins (47) and/or by triggering autophagy (49).

23

24 In our study, we show that ER-stress plays an important role in stellate cell – tumor  
25 cell interactions and that pharmacological inhibition of IRE1 $\alpha$ -endoribonuclease activity

1 slows down the progression of HCC *in vivo*. We demonstrate that tumor cells induce  
2 ER-stress in hepatic stellate cells, thereby contributing to their activation and creating  
3 an environment that is supportive for tumor growth and metastasis. Activated stellate  
4 cells are known to enhance migration and proliferation of tumor cells *in vitro* (8) and *in*  
5 *vivo* (50), possibly by producing extracellular matrix proteins and by producing growth  
6 factors. Extracellular matrix proteins such as collagen can act as a scaffold for tumor  
7 cell migration (51), alter the expression of MMP's (8) and induce epithelial-  
8 mesenchymal transition (52). Activated stellate cells are also an important source of  
9 hepatocyte growth factor, which promotes proliferation, cell invasion and epithelial-  
10 mesenchymal transition via the c-MET signaling pathway (53). Interestingly, blocking  
11 ER-stress in the stellate cell population reduced tumor-induced activation towards  
12 myofibroblasts, which then decreases proliferation and migration of tumor-cells in co-  
13 cultures. This suggests that targeting the microenvironment using an ER-stress  
14 inhibitor could be a promising strategy for patients with HCC.

15  
16 The UPR has been described as an essential hallmark of HCC (54), although its role  
17 within tumorigenesis remains controversial (18). While a mild to moderate level to ER-  
18 stress leads to activation of the UPR and enables cancer cells to survive and adapt to  
19 adverse environmental conditions, the occurrence of severe or sustained ER-stress  
20 leads to apoptosis. Both ER-stress inhibitors as ER-stress inducers have therefore  
21 been shown to act as potential anti-cancer therapies (55). A recent study by Wu *et al*,  
22 demonstrated that IRE1 $\alpha$  promotes progression of HCC and that hepatocyte specific  
23 ablation of IRE1 $\alpha$  results in a decreased tumorigenesis (56). In contrast to their study,  
24 we found a greater upregulation of actors of the IRE1 $\alpha$ -branch within the stroma than  
25 in the tumor itself and identified that expression of ER-stress markers was mainly

1 localized within the stellate cell population. An important difference between both  
2 studies is the mouse model that is used. While Wu *et al* used a single injection of DEN,  
3 we performed weekly injections, causing tumors to occur in a background of fibrosis,  
4 similar to what is seen in patients (26). Our *in vitro* studies with mono-cultures confirm  
5 that 4 $\mu$ 8C also has a direct effect on proliferation and migration of HCC cells – similar  
6 to the findings of Wu *et al* - and the response seems to depend on the tumor cell line.  
7 Adding 4 $\mu$ 8C to HepG2-cells significantly increased proliferation, while a significant  
8 decrease was seen in the Huh7-cells. This difference in response could be due  
9 IRE1 $\alpha$ 's function as a key cell fate regulator. On the one hand it can induce  
10 mechanisms that restore protein homeostasis and promote cytoprotection, while on  
11 the other hand IRE1 $\alpha$  also activates apoptotic signaling pathways. How and when  
12 IRE1 $\alpha$  exerts its cytoprotective or its pro-apoptotic function remains largely unknown.  
13 The duration and severity of ER-stress seems to be a major contributor to the switch  
14 towards apoptosis, possibly by inducing changes in the conformational structure of  
15 IRE1 $\alpha$  (57). The threshold at which cells experience a severe and prolonged ER-stress  
16 that would induce apoptosis could differ between different cell lines, depending on the  
17 translational capacity of the cells (e.g. ER-size, number of chaperones and the amount  
18 of degradation machinery) and the intrinsic sources that cause ER-stress (58). A study  
19 of Li *et al*, has specifically looked at how IRE1 $\alpha$  regulates cell growth and apoptosis in  
20 HepG2-cells (59). Similar to our findings, they discovered that inhibiting IRE1 $\alpha$   
21 enhances cell proliferation, while over-expression of IRE1 $\alpha$  increases the expression  
22 of polo-like kinase, which leads to apoptosis. Interestingly, polo-like kinases have  
23 divergent roles on HCC-cell growth depending on which cell line is used, which could  
24 explain the different response to 4 $\mu$ 8C in Huh7 and HepG2-cells (60). Studies on  
25 glioma cells show that IRE1 $\alpha$  regulates invasion through MMP's (61). In line with these

1 results, we also detected a reduction of MMP1-mRNA expression after 4 $\mu$ 8C-treatment  
2 and observed a direct effect on wound closure in HepG2-cells. These results indicate  
3 that ER-stress could play a direct role in regulating tumor cell invasion, in addition to  
4 its indirect effect via stellate cells.

5  
6 In conclusion, the aim of this study was to define the role of ER-stress in the cross-talk  
7 between hepatic stellate cells and tumor cells in liver cancer. We show that  
8 pharmacologic inhibition of the IRE1 $\alpha$ -signaling pathway decreases tumor burden in a  
9 DEN-induced mouse model for HCC. Using several *in vitro* 2D and 3D co-culturing  
10 methods, we identified that tumor cells induce ER-stress in hepatic stellate cells and  
11 that this contributes to their activation. Blocking ER-stress in these hepatic stellate cells  
12 prevents their activation, which then decreases proliferation and migration of tumor  
13 cells.

14

15

## 16 **ACKNOWLEDGEMENTS**

17 This research was funded through grants obtained from the Swedish Cancer  
18 Foundation (Cancerfonden, CAN2017/518 and CAN2013/1273), The Swedish  
19 children's cancer foundation (Barncancerfonden), the Swedish society for medical  
20 research (SSMF, S17-0092), the O.E. och Edla Johanssons stiftelse. These funding  
21 sources were not involved in the study design; collection, analysis and interpretation  
22 of data; writing of the report; and in the decision to submit the article for publication.  
23 We would like to thank visiting students Kim Vanhollebeke and Justine Dobbelaere for  
24 their technical assistance; GradienTech for providing us with their CellDirector assays  
25 and Paul O'Callaghan for his valuable input on our project.

1 **Competing interest:** The authors have no conflict of interest to report.

2

### 3 REFERENCES

- 4 1. Calderaro J, Ziol M, Paradis V, Zucman-Rossi J. Molecular and histological  
5 correlations in liver cancer. *Journal of hepatology*. 2019.doi:  
6 10.1016/j.jhep.2019.06.001
- 7 2. Coulouarn C, Clement B. Stellate cells and the development of liver cancer:  
8 therapeutic potential of targeting the stroma. *Journal of hepatology*. 2014;60(6):1306-  
9 9.doi: 10.1016/j.jhep.2014.02.003
- 10 3. Yu G, Jing Y, Kou X, Ye F, Gao L, Fan Q, et al. Hepatic stellate cells secreted  
11 hepatocyte growth factor contributes to the chemoresistance of hepatocellular  
12 carcinoma. *PloS one*. 2013;8(9):e73312.doi: 10.1371/journal.pone.0073312
- 13 4. Giannelli G, Villa E, Lahn M. Transforming Growth Factor-beta as a Therapeutic  
14 Target in Hepatocellular Carcinoma. *Cancer research*. 2014;74(7):1890-4.doi:  
15 10.1158/0008-5472.CAN-14-0243
- 16 5. Nitta T, Kim JS, Mohuczy D, Behrns KE. Murine cirrhosis induces hepatocyte  
17 epithelial mesenchymal transition and alterations in survival signaling pathways.  
18 *Hepatology*. 2008;48(3):909-19.doi: 10.1002/hep.22397
- 19 6. Dooley S, Weng H, Mertens PR. Hypotheses on the role of transforming growth  
20 factor-beta in the onset and progression of hepatocellular carcinoma. *Digestive*  
21 *diseases*. 2009;27(2):93-101.doi: 10.1159/000218340
- 22 7. Lin N, Chen Z, Lu Y, Li Y, Hu K, Xu R. Role of activated hepatic stellate cells in  
23 proliferation and metastasis of hepatocellular carcinoma. *Hepatology research : the*  
24 *official journal of the Japan Society of Hepatology*. 2014.doi: 10.1111/hepr.12356
- 25 8. Song Y, Kim SH, Kim KM, Choi EK, Kim J, Seo HR. Activated hepatic stellate  
26 cells play pivotal roles in hepatocellular carcinoma cell chemoresistance and migration  
27 in multicellular tumor spheroids. *Sci Rep*. 2016;6:36750.doi: 10.1038/srep36750
- 28 9. Zhang F, Hao M, Jin H, Yao Z, Lian N, Wu L, et al. Canonical hedgehog  
29 signalling regulates hepatic stellate cell-mediated angiogenesis in liver fibrosis. *Br J*  
30 *Pharmacol*. 2017;174(5):409-23.doi: 10.1111/bph.13701
- 31 10. Taura K, De Minicis S, Seki E, Hatano E, Iwaisako K, Osterreicher CH, et al.  
32 Hepatic stellate cells secrete angiopoietin 1 that induces angiogenesis in liver fibrosis.  
33 *Gastroenterology*. 2008;135(5):1729-38.doi: 10.1053/j.gastro.2008.07.065
- 34 11. Caja L, Dituri F, Mancarella S, Caballero-Diaz D, Moustakas A, Giannelli G, et  
35 al. TGF-beta and the Tissue Microenvironment: Relevance in Fibrosis and Cancer. *Int*  
36 *J Mol Sci*. 2018;19(5).doi: 10.3390/ijms19051294
- 37 12. Lu Y, Lin N, Chen Z, Xu R. Hypoxia-induced secretion of platelet-derived growth  
38 factor-BB by hepatocellular carcinoma cells increases activated hepatic stellate cell  
39 proliferation, migration and expression of vascular endothelial growth factor-A. *Mol*  
40 *Med Rep*. 2015;11(1):691-7.doi: 10.3892/mmr.2014.2689
- 41 13. Carloni V, Luong TV, Rombouts K. Hepatic stellate cells and extracellular matrix  
42 in hepatocellular carcinoma: more complicated than ever. *Liver international : official*  
43 *journal of the International Association for the Study of the Liver*. 2014.doi:  
44 10.1111/liv.12465
- 45 14. Schroder M, Kaufman RJ. ER stress and the unfolded protein response. *Mutat*  
46 *Res-Fund Mol M*. 2005;569(1-2):29-63.doi: 10.1016/j.mrfmmm.2004.06.056

- 1 15. Sovolyova N, Healy S, Samali A, Logue SE. Stressed to death - mechanisms  
2 of ER stress-induced cell death. *Biol Chem.* 2014;395(1):1-13.doi: 10.1515/hsz-2013-  
3 0174
- 4 16. Liang H, Xiao J, Zhou Z, Wu J, Ge F, Li Z, et al. Hypoxia induces miR-153  
5 through the IRE1alpha-XBP1 pathway to fine tune the HIF1alpha/VEGFA axis in breast  
6 cancer angiogenesis. *Oncogene.* 2018.doi: 10.1038/s41388-017-0089-8
- 7 17. Li XX, Zhang HS, Xu YM, Zhang RJ, Chen Y, Fan L, et al. Knockdown of  
8 IRE1alpha inhibits colonic tumorigenesis through decreasing beta-catenin and  
9 IRE1alpha targeting suppresses colon cancer cells. *Oncogene.* 2017;36(48):6738-  
10 46.doi: 10.1038/onc.2017.284
- 11 18. Vandewynckel YP, Laukens D, Geerts A, Bogaerts E, Paridaens A, Verhelst X,  
12 et al. The paradox of the unfolded protein response in cancer. *Anticancer Res.*  
13 2013;33(11):4683-94.doi:  
14 19. Heindryckx F, Li JP. Role of proteoglycans in neuro-inflammation and central  
15 nervous system fibrosis. *Matrix Biol.* 2018;68-69:589-601.doi:  
16 10.1016/j.matbio.2018.01.015
- 17 20. Bandla H, Dasgupta D, Mauer AS, Nozickova B, Kumar S, Hirsova P, et al.  
18 Deletion of endoplasmic reticulum stress-responsive co-chaperone p58(IPK) protects  
19 mice from diet-induced steatohepatitis. *Hepatology research : the official journal of the*  
20 *Japan Society of Hepatology.* 2018.doi: 10.1111/hepr.13052
- 21 21. Kwanten WJ, Vandewynckel YP, Martinet W, De Winter BY, Michielsen PP, Van  
22 Hoof VO, et al. Hepatocellular autophagy modulates the unfolded protein response  
23 and fasting-induced steatosis in mice. *American journal of physiology Gastrointestinal*  
24 *and liver physiology.* 2016;311(4):G599-G609.doi: 10.1152/ajpgi.00418.2015
- 25 22. Lebeauvin C, Vallee D, Hazari Y, Hetz C, Chevet E, Bailly-Maitre B.  
26 Endoplasmic reticulum stress signalling and the pathogenesis of non-alcoholic fatty  
27 liver disease. *Journal of hepatology.* 2018;69(4):927-47.doi:  
28 10.1016/j.jhep.2018.06.008
- 29 23. Li J, He J, Fu Y, Hu X, Sun LQ, Huang Y, et al. Hepatitis B virus X protein inhibits  
30 apoptosis by modulating endoplasmic reticulum stress response. *Oncotarget.*  
31 2017;8(56):96027-34.doi: 10.18632/oncotarget.21630
- 32 24. Sasaki M, Yoshimura-Miyakoshi M, Sato Y, Nakanuma Y. A possible  
33 involvement of endoplasmic reticulum stress in biliary epithelial autophagy and  
34 senescence in primary biliary cirrhosis. *J Gastroenterol.* 2015;50(9):984-95.doi:  
35 10.1007/s00535-014-1033-0
- 36 25. Heindryckx F, Binet F, Ponticos M, Rombouts K, Lau J, Kreuger J, et al.  
37 Endoplasmic reticulum stress enhances fibrosis through IRE1alpha-mediated  
38 degradation of miR-150 and XBP-1 splicing. *EMBO Mol Med.* 2016;8(7):729-44.doi:  
39 10.15252/emmm.201505925
- 40 26. Heindryckx F, Mertens K, Charette N, Vandeghinste B, Casteleyn C, Van  
41 Steenkiste C, et al. Kinetics of angiogenic changes in a new mouse model for  
42 hepatocellular carcinoma. *Mol Cancer.* 2010;9:219.doi: 10.1186/1476-4598-9-219
- 43 27. Heindryckx F, Bogaerts E, Coulon SH, Devlies H, Geerts AM, Libbrecht L, et al.  
44 Inhibition of the placental growth factor decreases burden of cholangiocarcinoma and  
45 hepatocellular carcinoma in a transgenic mouse model. *Eur J Gastroenterol Hepatol.*  
46 2012;24(9):1020-32.doi: 10.1097/MEG.0b013e3283554219
- 47 28. Krauthamer M, Rouvinov K, Ariad S, Man S, Walfish S, Pinsk I, et al. A study of  
48 inflammation-based predictors of tumor response to neoadjuvant chemoradiotherapy  
49 for locally advanced rectal cancer. *Oncology.* 2013;85(1):27-32.doi:  
50 10.1159/000348385



- 1 29. Heindryckx F. 2020 [doi: <https://doi.org/10.5061/dryad.6wwwpzgmv2>
- 2 30. Calitz C, Hamman JH, Fey SJ, Viljoen AM, Gouws C, Wrzesinski K. A sub-  
3 chronic Xysmalobium undulatum hepatotoxicity investigation in HepG2/C3A spheroid  
4 cultures compared to an in vivo model. J Ethnopharmacol. 2019;239:111897.doi:  
5 10.1016/j.jep.2019.111897
- 6 31. Mazza G, Al-Akkad W, Telese A, Longato L, Urbani L, Robinson B, et al. Rapid  
7 production of human liver scaffolds for functional tissue engineering by high shear  
8 stress oscillation-decellularization. Sci Rep. 2017;7(1):5534.doi: 10.1038/s41598-017-  
9 05134-1
- 10 32. Thanapirom K, Frenguelli L, Al-Akkad W, Zhang ZZ, Pinzani M, Mazza G, et al.  
11 Optimization and validation of a novel three-dimensional co-culture system in  
12 decellularized human liver scaffold for the study of liver fibrosis and cancer. Journal of  
13 hepatology. 2019;70:E24-E.doi: Doi 10.1016/S0618-8278(19)30042-8
- 14 33. Ruifrok AC, Johnston DA. Quantification of histochemical staining by color  
15 deconvolution. Analytical and quantitative cytology and histology / the International  
16 Academy of Cytology [and] American Society of Cytology. 2001;23(4):291-9.doi:  
17 34. Seok JY, Na DC, Woo HG, Roncalli M, Kwon SM, Yoo JE, et al. A fibrous  
18 stromal component in hepatocellular carcinoma reveals a cholangiocarcinoma-like  
19 gene expression trait and epithelial-mesenchymal transition. Hepatology.  
20 2012;55(6):1776-86.doi: 10.1002/hep.25570
- 21 35. Rouillard AD, Gundersen GW, Fernandez NF, Wang Z, Monteiro CD,  
22 McDermott MG, et al. The harmonizome: a collection of processed datasets gathered  
23 to serve and mine knowledge about genes and proteins. Database (Oxford).  
24 2016;2016.doi: 10.1093/database/baw100
- 25 36. Subramanian A, Tamayo P, Mootha VK, Mukherjee S, Ebert BL, Gillette MA, et  
26 al. Gene set enrichment analysis: a knowledge-based approach for interpreting  
27 genome-wide expression profiles. Proc Natl Acad Sci U S A. 2005;102(43):15545-  
28 50.doi: 10.1073/pnas.0506580102
- 29 37. [https://www.proteinatlas.org/ENSG00000070540-](https://www.proteinatlas.org/ENSG00000070540-WIP11/pathology/liver+cancer)  
30 [WIP11/pathology/liver+cancer](https://www.proteinatlas.org/ENSG00000070540-WIP11/pathology/liver+cancer).doi: . The Human Protein Atlas. 2019;V19.doi:
- 31 38. [https://www.proteinatlas.org/ENSG00000160691-](https://www.proteinatlas.org/ENSG00000160691-SHC1/pathology/liver+cancer)  
32 [SHC1/pathology/liver+cancer](https://www.proteinatlas.org/ENSG00000160691-SHC1/pathology/liver+cancer). The Human Protein Atlas.V19.doi:
- 33 39. [https://www.proteinatlas.org/ENSG00000068971-](https://www.proteinatlas.org/ENSG00000068971-PPP2R5B/pathology/liver+cancer#imid_9419368)  
34 [PPP2R5B/pathology/liver+cancer#imid\\_9419368](https://www.proteinatlas.org/ENSG00000068971-PPP2R5B/pathology/liver+cancer#imid_9419368). The Human Protein Atlas.V19.doi:
- 35 40. [https://www.proteinatlas.org/ENSG00000044574-](https://www.proteinatlas.org/ENSG00000044574-HSPA5/pathology/liver+cancer)  
36 [HSPA5/pathology/liver+cancer](https://www.proteinatlas.org/ENSG00000044574-HSPA5/pathology/liver+cancer). The Human Protein Atlas.V19.doi:
- 37 41. Uhlen M, Fagerberg L, Hallstrom BM, Lindskog C, Oksvold P, Mardinoglu A, et  
38 al. Proteomics. Tissue-based map of the human proteome. Science.  
39 2015;347(6220):1260419.doi: 10.1126/science.1260419
- 40 42. Hang HL, Liu XY, Wang HT, Xu N, Bian JM, Zhang JJ, et al. Hepatocyte nuclear  
41 factor 4A improves hepatic differentiation of immortalized adult human hepatocytes  
42 and improves liver function and survival. Experimental cell research. 2017;360(2):81-  
43 93.doi: 10.1016/j.yexcr.2017.08.020
- 44 43. Cormier N, Yeo A, Fiorentino E, Paxson J. Optimization of the Wound Scratch  
45 Assay to Detect Changes in Murine Mesenchymal Stromal Cell Migration After  
46 Damage by Soluble Cigarette Smoke Extract. J Vis Exp. 2015(106):e53414.doi:  
47 10.3791/53414
- 48 44. Bise R, Kanade T, Yin Z, Huh SI. Automatic cell tracking applied to analysis of  
49 cell migration in wound healing assay. Conf Proc IEEE Eng Med Biol Soc.  
50 2011;2011:6174-9.doi: 10.1109/IEMBS.2011.6091525



- 1 45. Oudin MJ, Weaver VM. Physical and Chemical Gradients in the Tumor  
2 Microenvironment Regulate Tumor Cell Invasion, Migration, and Metastasis. *Cold*  
3 *Spring Harb Symp Quant Biol.* 2016;81:189-205.doi: 10.1101/sqb.2016.81.030817
- 4 46. Heindryckx F, Gerwins P. Targeting the tumor stroma in hepatocellular  
5 carcinoma. *World J Hepatol.* 2015;7(2):165-76.doi: 10.4254/wjh.v7.i2.165
- 6 47. Koo JH, Lee HJ, Kim W, Kim SG. Endoplasmic Reticulum Stress in Hepatic  
7 Stellate Cells Promotes Liver Fibrosis via PERK-Mediated Degradation of HNRNPA1  
8 and Up-regulation of SMAD2. *Gastroenterology.* 2016;150(1):181-93 e8.doi:  
9 10.1053/j.gastro.2015.09.039
- 10 48. Hernandez-Gea V, Hilscher M, Rozenfeld R, Lim MP, Nieto N, Werner S, et al.  
11 Endoplasmic reticulum stress induces fibrogenic activity in hepatic stellate cells  
12 through autophagy. *Journal of hepatology.* 2013;59(1):98-104.doi:  
13 10.1016/j.jhep.2013.02.016
- 14 49. Kim RS, Hasegawa D, Goossens N, Tsuchida T, Athwal V, Sun X, et al. The  
15 XBP1 Arm of the Unfolded Protein Response Induces Fibrogenic Activity in Hepatic  
16 Stellate Cells Through Autophagy. *Sci Rep.* 2016;6:39342.doi: 10.1038/srep39342
- 17 50. Amann T, Bataille F, Spruss T, Muhlbauer M, Gabele E, Scholmerich J, et al.  
18 Activated hepatic stellate cells promote tumorigenicity of hepatocellular carcinoma.  
19 *Cancer Sci.* 2009;100(4):646-53.doi: 10.1111/j.1349-7006.2009.01087.x
- 20 51. Han W, Chen S, Yuan W, Fan Q, Tian J, Wang X, et al. Oriented collagen fibers  
21 direct tumor cell intravasation. *Proceedings of the National Academy of Sciences of*  
22 *the United States of America.* 2016;113(40):11208-13.doi: 10.1073/pnas.1610347113
- 23 52. Kumar S, Das A, Sen S. Extracellular matrix density promotes EMT by  
24 weakening cell-cell adhesions. *Mol Biosyst.* 2014;10(4):838-50.doi:  
25 10.1039/c3mb70431a
- 26 53. Liu WT, Jing YY, Yu GF, Chen H, Han ZP, Yu DD, et al. Hepatic stellate cell  
27 promoted hepatoma cell invasion via the HGF/c-Met signaling pathway regulated by  
28 p53. *Cell Cycle.* 2016;15(7):886-94.doi: 10.1080/15384101.2016.1152428
- 29 54. Shuda M, Kondoh N, Imazeki N, Tanaka K, Okada T, Mori K, et al. Activation of  
30 the ATF6, XBP1 and grp78 genes in human hepatocellular carcinoma: a possible  
31 involvement of the ER stress pathway in hepatocarcinogenesis. *Journal of hepatology.*  
32 2003;38(5):605-14.doi:
- 33 55. Corazzari M, Gagliardi M, Fimia GM, Piacentini M. Endoplasmic Reticulum  
34 Stress, Unfolded Protein Response, and Cancer Cell Fate. *Front Oncol.* 2017;7:78.doi:  
35 10.3389/fonc.2017.00078
- 36 56. Wu Y, Shan B, Dai J, Xia Z, Cai J, Chen T, et al. Dual Role for Inositol-requiring  
37 Enzyme 1alpha in Promoting the Development of Hepatocellular Carcinoma during  
38 Diet-induced Obesity. *Hepatology.* 2018.doi: 10.1002/hep.29871
- 39 57. Ghosh R, Wang L, Wang ES, Perera BG, Igbaria A, Morita S, et al. Allosteric  
40 inhibition of the IRE1alpha RNase preserves cell viability and function during  
41 endoplasmic reticulum stress. *Cell.* 2014;158(3):534-48.doi:  
42 10.1016/j.cell.2014.07.002
- 43 58. Cubillos-Ruiz JR, Bettigole SE, Glimcher LH. Tumorigenic and  
44 Immunosuppressive Effects of Endoplasmic Reticulum Stress in Cancer. *Cell.*  
45 2017;168(4):692-706.doi: 10.1016/j.cell.2016.12.004
- 46 59. Li X, Zhu H, Huang H, Jiang R, Zhao W, Liu Y, et al. Study on the effect of  
47 IRE1a on cell growth and apoptosis via modulation PLK1 in ER stress response.  
48 *Molecular and cellular biochemistry.* 2012;365(1-2):99-108.doi: 10.1007/s11010-012-  
49 1248-4

- 1 60. Pellegrino R, Calvisi DF, Ladu S, Ehemann V, Staniscia T, Evert M, et al.  
2 Oncogenic and tumor suppressive roles of polo-like kinases in human hepatocellular  
3 carcinoma. *Hepatology*. 2010;51(3):857-68.doi: 10.1002/hep.23467
- 4 61. Auf G, Jabouille A, Guerit S, Pineau R, Delugin M, Bouchecareilh M, et al.  
5 Inositol-requiring enzyme 1alpha is a key regulator of angiogenesis and invasion in  
6 malignant glioma. *Proceedings of the National Academy of Sciences of the United*  
7 *States of America*. 2010;107(35):15553-8.doi: 10.1073/pnas.0914072107
- 8

## 1 **Figure legends**

2 **Fig. 1. Inhibiting IRE1 $\alpha$  reduces tumor burden *in vivo*.** (A) Representative images of liver slides  
3 stained with hematoxylin and eosin (H&E), Sirius red and  $\alpha$ SMA-antibodies. (B) tumor burden of mice  
4 with DEN-induced HCC treated with 4 $\mu$ 8C or vehicle-treated controls. (C) Quantification of percentage  
5 of collagen and (D)  $\alpha$ SMA on liver slides. (E) mRNA expression of PCNA in liver tissue from mice with  
6 HCC treated with 4 $\mu$ 8C (F) Heatmap showing protein expression levels in healthy liver, DEN-induced  
7 HCC and DEN-induced HCC treated with 4 $\mu$ 8C from 3 biological replicates per group. P-values were  
8 calculated via the Student's T-test, scale bars = 120 $\mu$ m.

9  
10 **Fig. 2. Tumor cells secrete factors that induce ER-stress in stellate cells, which contributes to**  
11 **their activation.** (A) mRNA-expression of ER-stress markers CHOP, (B) spliced XBP1, (C) BiP in  
12 stellate cells (LX2) co-cultured with cancer cells (HepG2 or Huh7) and treated with 4 $\mu$ 8C or control. (D)  
13 Detection of spliced (XBP1s) and unspliced XBP1 (XBP1u) visualized by digestion of XBP1u by *Pst*-I.  
14 (E) protein expression of p-IRE1 $\alpha$  and vinculin in stellate cells (LX2) co-cultured with cancer cells  
15 (HepG2 or Huh7) in transwell assays and treated with 4 $\mu$ 8C or control. (F) mRNA-expression of stellate  
16 cell activation markers  $\alpha$ SMA and (G) collagen in LX2-cells co-cultured with HepG2 or Huh7-cells and  
17 treated with or without 4 $\mu$ 8C. P-values were calculated via the Student's T-test with 10 biological  
18 replicates per group.

19  
20 **Fig. 3. Inhibiting IRE1 $\alpha$  decreases stellate cell activation in human liver 3D scaffolds engrafted**  
21 **with stellate cells and tumor cells.** (A) Representative images of H&E and Sirius red stained slides of  
22 decellularized human liver scaffolds engrafted with LX2 stellate cells and HepG2-tumor cells treated  
23 with 4 $\mu$ 8C or control. (B) mRNA-expression of the stellate cells activation marker collagen and ER-  
24 stress markers BiP, spliced XBP-1 (XBP1-S) and CHOP in liver scaffolds engrafted with stellate cells  
25 (LX2) and cancer cells (HepG2), treated with 4 $\mu$ 8C or control. P-values were calculated via the  
26 Student's T-test from 3 biological replicates per group, scale bars = 100 $\mu$ m.

27

1 **Fig. 4. Inhibition of IRE1 $\alpha$  decreases tumor cell proliferation.** (A) PCNA mRNA-expression of  
2 HepG2 or Huh7-cells grown with LX2-cells in transwell inserts and treated with the IRE1 $\alpha$ -inhibitor 4 $\mu$ 8C  
3 or control. (B) Relative cell number of LX2 and HepG2 or (C) LX2 and Huh7-cells treated with 4 $\mu$ 8C or  
4 control. (D) Representative images of tumor cells (HepG2 or Huh7) and LX2-stellate cells stained with  
5 antibodies against the HCC-marker Epcam and the proliferation marker ki67. (E) Cell proliferation of  
6 HepG2 or HepG2+LX2 spheroids and (F) Huh7 or Huh7+LX2 spheroids treated with 4 $\mu$ 8C or control.  
7 P-values were calculated via the Student's T-test from 9 biological replicates per group, scale bars =  
8 50 $\mu$ m.

9  
10 **Fig. 5. Inhibition of IRE1 $\alpha$  decreases cell proliferation and improves liver function in human liver**  
11 **scaffolds engrafted with stellate cells and tumor cells.** (A) PCNA and (B) Hnf4a expression of  
12 human liver scaffolds engrafted with HepG2-tumor cells and LX2-stellate cells, treated with 4 $\mu$ 8C or  
13 control. (C) Representative images of tumor cells (HepG2) and LX2-stellate cells stained with antibodies  
14 against the HCC-marker Epcam and the proliferation marker ki67. P-values were calculated via the  
15 Student's T-test, scale bars = 100 $\mu$ m.

16  
17 **Fig. 6. Inhibition of IRE1 $\alpha$  decreases cell migration.** (A) mRNA-expression of pro-metastatic markers  
18 MMP9 and (B) MMP1 in HepG2 and Huh7-cells co-cultured with LX2-cells and treated with 4 $\mu$ 8C or  
19 control. (C) Scratch wound on HepG2-cells and LX2-cells treated with 4 $\mu$ 8C or control. (D) Images of  
20 Cell Tracker stained HepG2-cells (Green) and LX2-cells (Red) invading the scratch area. (E)  
21 Quantification of wound size in HepG2-cells and LX2-cells treated with 4 $\mu$ 8C or control. (F) Number of  
22 HepG2-cells and LX2-cells invading the scratch wound after 24h in co-cultures and (G) mono-cultures.  
23 P-values were calculated via the Student's T-test from 10 biological replicates per group (panel A and  
24 B) or 6 biological replicates per group (panel E-G), scale bars = 120 $\mu$ m.

25  
26 **Fig. 7. Silencing IRE1 $\alpha$  in LX2-cells mimics 4 $\mu$ 8C.** (A) IRE1 $\alpha$ -mRNA-expression of LX2-cells  
27 transfected with IRE1 $\alpha$ -siRNA (si-IRE1 $\alpha$ ), mock-transfected (Scr) or untransfected (Ctrl). (B) PCNA-  
28 mRNA-expression of HepG2-cells co-cultured with IRE1 $\alpha$ -silenced LX2-cells or controls (C). Relative

1 cell numbers in co-cultures of HepG2-cells and IRE1 $\alpha$ -silenced LX2-cells or controls. **(D)** Proliferation  
2 of spheroids of HepG2-cells and IRE1 $\alpha$ -silenced LX2-cells or controls **(E)** Images and **(F)** quantification  
3 of  $\alpha$ SMA-stained spheroids with HepG2-cells and IRE1 $\alpha$ -silenced LX2-cells or controls. **(G)** Images and  
4 **(H)** quantification of scratch wound of HepG2-cells co-cultured with IRE1 $\alpha$ -silenced LX2-cells or  
5 controls. P-values were calculated via the Student's T-test from 3 biological replicates per group, scale  
6 bars = 50 $\mu$ m (E) or 120 $\mu$ m (G).

7

8 **Supplementary figure 1. Activation of the unfolded protein response is mainly located in the**  
9 **stroma of mice with HCC. (A)** mRNA-expression of the ER-stress marker BiP in tumor and surrounding  
10 non-tumoral liver tissue in mice with DEN-induced HCC treated with or without the IRE1 $\alpha$ -inhibitor 4 $\mu$ 8C  
11 or healthy mice. **(B)** Representative western blot image showing protein expression of BiP in liver tissue  
12 from mice with HCC treated with or without 4 $\mu$ 8C **(C)** Quantification of p-IRE1 $\alpha$  staining on murine liver  
13 sections. **(D)** Co-staining of liver tissue with antibodies against  $\alpha$ SMA and p-IRE1 $\alpha$ . **(E)** Co-staining of  
14 liver tissue with antibodies against  $\alpha$ SMA and BiP. P-values were calculated via the Student's T-test,  
15 scale bars = 50 $\mu$ m.

16

17 **Supplementary figure 2. Activation of the unfolded protein response pathway is increased in**  
18 **patients with fibrotic HCC. (A)** Heat map showing gene-set enrichment analysis results from samples  
19 from fibrous HCC versus non-fibrous HCC. **(C)** Immunohistochemically stained liver biopsies from HCC-  
20 patients obtained from the human protein atlas, using antibodies against IRE1 $\alpha$ -mediated actors of the  
21 unfolded protein response: WIPI1, SHC1, PPP2R5B and BiP. **(D)** Kaplan-Meier survival curves of HCC-  
22 patients with high or low expression of WIPI1, SHC1, PPP2R5B and BiP. P-values were calculated via  
23 a Log-Rank test.

24

25 **Supplementary Figure 3. Secretion of TGF $\beta$  by tumor cells activates stellate cells and induces**  
26 **ER-stress. (A)** concentration of TGF $\beta$  in medium from tumor cells (HepG2 or Huh7) grown in mono-  
27 culture or co-cultured with LX2-stellate cells, treated with 4 $\mu$ 8C or control. **(B)** concentration of TGF $\beta$  in  
28 medium from liver scaffolds engrafted with stellate cells **(C)** (LX2) and tumor cells (HepG2) treated with

1 4 $\mu$ 8C or control. mRNA-expression of the ER-stress markers CHOP, **(D)** spliced XBP1, **(E)** unspliced  
 2 XBP1 and **(F)** BiP in hepatic stellate cells (LX2) grown as mono-culture or in co-cultures with the cancer  
 3 cell lines HepG2 and Huh7 treated with the TGF $\beta$  receptor inhibitor SB-431541 or control. **(G)** mRNA-  
 4 expression of stellate cell activation markers  $\alpha$ SMA and **(H)** collagen in LX2-cells grown with HepG2 or  
 5 Huh7-cells and treated with SB-431541 or control. P-values were calculated via the Student's T-test  
 6 from 7 biological replicates per group.

7 **Supplementary Figure 4. Inhibiting IRE1 $\alpha$  decreases chemotaxis.** **(A)** migration plots of LX2-cells  
 8 co-cultured with HepG2-cells exposed to an FBS-gradient (increasing towards the right) and treated  
 9 with control or **(B)** 4 $\mu$ 8C **(C)** Quantification of total migration and **(D)** directional migration of LX2-cells  
 10 (co-cultured with HepG2-cells) towards an FBS-gradient with or without 4 $\mu$ 8C. **(E)** Migration plots of  
 11 HepG2-cells co-cultured with LX2-stellate cells and exposed to an FBS-gradient and treated with control  
 12 or **(F)** 4 $\mu$ 8C. **(G)** Quantification of total migration and **(H)** directional migration of HepG2-cells (co-  
 13 cultured with LX2-cells) towards an FBS-gradient with or without 4 $\mu$ 8C. P-values were calculated via  
 14 the Student's T-test from 3 biological replicates per group.

15 **Table 1:** A proteomics array using the Olink Mouse Exploratory assay – source data figure 1F

| Protein name | Biological process            | CTL   |         | Den     |         | DEN+4u8c |         | Statistical significance |             |              |
|--------------|-------------------------------|-------|---------|---------|---------|----------|---------|--------------------------|-------------|--------------|
|              |                               | mean  | St. Dev | Average | St. Dev | Average  | St. Dev | DEN vs Ctrl              | DEN vs 4u8C | Ctrl vs 4u8c |
| Clmp         | Not prognostic in HCC         | 1,68  | 0,14    | 2,97    | 1,00    | 2,48     | 0,64    | *                        |             |              |
| Yes1         | HCC promotor                  | 7,11  | 0,29    | 7,51    | 0,20    | 7,44     | 0,19    | *                        |             |              |
| Foxo1        | Tumor suppressor              | 4,15  | 0,06    | 4,12    | 0,73    | 3,87     | 0,49    |                          |             |              |
| Pla2g4a      | HCC promotor                  | 3,42  | 0,38    | 5,70    | 1,36    | 5,04     | 0,80    | *                        |             | *            |
| Prdx5        | HCC promotor                  | 7,37  | 0,49    | 7,23    | 0,26    | 6,67     | 0,34    |                          | *           |              |
| Tgfa         | Tumor growth factor           | 5,36  | 0,52    | 6,81    | 0,64    | 6,93     | 0,88    | *                        |             | *            |
| Epo          | Unfavorable prognostic marker | 3,20  | 0,34    | 3,71    | 0,35    | 3,37     | 0,33    |                          |             |              |
| Axin1        | HCC promotor                  | 4,24  | 0,38    | 4,80    | 0,37    | 4,39     | 0,35    |                          |             |              |
| Fst          | HCC promotor                  | 5,87  | 0,31    | 8,04    | 0,73    | 7,50     | 0,71    | *                        |             | *            |
| Nadk         | Not prognostic in HCC         | 10,10 | 0,13    | 10,14   | 0,18    | 10,30    | 0,27    |                          |             |              |
| Snap29       | Not prognostic in HCC         | 7,70  | 0,32    | 7,87    | 0,32    | 7,62     | 0,30    |                          |             |              |

|        |                              |               |      |      |      |      |      |   |   |   |
|--------|------------------------------|---------------|------|------|------|------|------|---|---|---|
| S100a4 | HCC promotor                 | 2,7<br>3      | 0,74 | 7,01 | 0,62 | 6,85 | 0,97 | * |   | * |
| Kitlg  | Metastasis                   | 2,4<br>8      | 0,42 | 3,74 | 0,62 | 3,31 | 0,98 | * |   |   |
| Gfra1  | HCC promotor                 | 4,4<br>0      | 0,35 | 5,07 | 0,40 | 4,92 | 0,39 | * |   |   |
| Ppp1r2 | Not prognostic in HCC        | 4,3<br>7      | 0,16 | 4,86 | 0,46 | 4,47 | 0,43 |   |   |   |
| Cyr61  | HCC promotor                 | 2,4<br>0      | 0,53 | 4,14 | 1,64 | 3,13 | 1,22 | * |   |   |
| Ahr    | Not prognostic in HCC        | 6,9<br>5      | 0,46 | 7,68 | 0,74 | 7,38 | 0,64 |   |   |   |
| Ccl2   | HCC promotor                 | 4,5<br>9      | 0,58 | 9,69 | 2,04 | 8,93 | 1,56 | * |   | * |
| Qdpr   | Not prognostic in HCC        | 7,7<br>1      | 0,11 | 7,72 | 0,14 | 7,54 | 0,15 |   |   |   |
| Fas    | HCC promotor                 | 8,6<br>6      | 0,18 | 8,83 | 0,18 | 8,70 | 0,18 |   |   |   |
| Riox2  | HCC promotor                 | 7,1<br>0      | 0,15 | 7,71 | 0,38 | 7,59 | 0,14 | * |   | * |
| Epcam  | HCC promotor                 | 1,5<br>6      | 0,33 | 3,16 | 1,14 | 3,27 | 0,89 | * |   |   |
| Ccl3   | Prognostic marker            | 1,4<br>9      | 0,39 | 4,42 | 1,86 | 3,73 | 1,07 | * |   | * |
| Crim1  | HCC promotor                 | 2,4<br>6      | 0,28 | 3,71 | 1,09 | 3,21 | 0,56 | * |   | * |
| Hgf    | Tumor growth factor          | 6,6<br>9      | 0,35 | 7,94 | 1,01 | 7,41 | 0,71 | * |   |   |
| Sez6l2 | HCC promotor                 | -<br>0,2<br>9 | 0,15 | 0,61 | 0,53 | 0,19 | 0,29 | * |   |   |
| Il1a   | Inflammation and fibrosis    | 6,6<br>5      | 0,51 | 8,35 | 0,65 | 7,62 | 0,54 | * |   | * |
| Ddah1  | HCC promotor                 | 8,0<br>4      | 0,22 | 8,18 | 0,05 | 7,84 | 0,18 |   | * |   |
| Acvr1l | Not prognostic in HCC        | 2,0<br>9      | 0,18 | 3,44 | 1,31 | 2,81 | 0,47 |   |   |   |
| Cxcl9  | Inflammation and fibrosis    | 3,6<br>8      | 0,86 | 7,71 | 1,68 | 6,65 | 1,58 | * |   | * |
| Map2k6 | Not prognostic in HCC        | 7,7<br>5      | 0,15 | 7,98 | 0,41 | 7,88 | 0,28 |   |   |   |
| Casp3  | Tumor surrpressor            | 9,2<br>2      | 0,19 | 9,74 | 0,35 | 9,43 | 0,26 |   |   |   |
| Pdgfb  | Tumor growth factor          | 3,5<br>2      | 0,31 | 4,96 | 1,27 | 3,97 | 0,40 | * |   |   |
| Igsf3  | Unfavorable prognotic marker | 3,1<br>2      | 0,28 | 4,19 | 0,82 | 3,64 | 0,72 |   |   |   |
| Cxcl1  | HCC promotor                 | 3,7<br>7      | 0,40 | 5,74 | 0,78 | 5,06 | 0,51 | * |   | * |
| Pak4   | HCC promotor                 | 3,4<br>7      | 0,42 | 4,39 | 0,68 | 3,93 | 0,54 |   |   |   |
| Lpl    | Not prognostic in HCC        | 1,6<br>6      | 0,40 | 2,44 | 0,45 | 2,02 | 0,60 |   |   |   |
| Dctn2  | Unfavorable prognotic marker | 5,4<br>8      | 1,31 | 5,67 | 0,70 | 4,98 | 0,55 |   |   |   |

|         |                               |       |      |       |      |       |      |  |  |  |
|---------|-------------------------------|-------|------|-------|------|-------|------|--|--|--|
| Ntf3    | Not prognostic in HCC         | 2,16  | 0,27 | 2,80  | 0,71 | 2,27  | 0,40 |  |  |  |
| Tnfsf12 | HCC promotor                  | 5,28  | 0,35 | 6,00  | 0,76 | 5,59  | 0,62 |  |  |  |
| Ccl20   | Unfavorable prognostic marker | 5,20  | 0,34 | 5,92  | 0,81 | 5,53  | 0,66 |  |  |  |
| Fli1    | HCC promotor                  | 1,91  | 0,22 | 3,73  | 1,38 | 2,98  | 0,83 |  |  |  |
| Tpp1    | Unfavorable prognostic marker | 3,67  | 0,38 | 4,24  | 0,64 | 3,73  | 0,50 |  |  |  |
| Parp1   | Unfavorable prognostic marker | 10,30 | 0,72 | 10,93 | 0,49 | 10,51 | 0,62 |  |  |  |

1

2

3

**Table 2: Genes the contributed to the core-enrichment of the GSEA**

| Probe                   | Description                                                                                | Rank Gene list | Rank Metric score | Core enrichment | UPR branch     |
|-------------------------|--------------------------------------------------------------------------------------------|----------------|-------------------|-----------------|----------------|
| <a href="#">ASNS</a>    | asparagine synthetase (glutamine-hydrolyzing) [Source:HGNC Symbol;Acc:HGNC:753]            | 207            | 0.940             | Yes             | Perk           |
| <a href="#">PPP2R5B</a> | protein phosphatase 2 regulatory subunit B'beta [Source:HGNC Symbol;Acc:HGNC:9310]         | 423            | 0.821             | Yes             | Ire1a          |
| <a href="#">CCL2</a>    | C-C motif chemokine ligand 2 [Source:HGNC Symbol;Acc:HGNC:10618]                           | 847            | 0.689             | Yes             | Ire1a and Perk |
| <a href="#">EXOSC9</a>  | exosome component 9 [Source:HGNC Symbol;Acc:HGNC:9137]                                     | 1004           | 0.654             | Yes             | Ire1a and Perk |
| <a href="#">WIPI1</a>   | WD repeat domain, phosphoinositide interacting 1 [Source:HGNC Symbol;Acc:HGNC:25471]       | 1022           | 0.649             | Yes             | Ire1a          |
| <a href="#">KDELR3</a>  | KDEL endoplasmic reticulum protein retention receptor 3 [Source:HGNC Symbol;Acc:HGNC:6306] | 1106           | 0.635             | Yes             | Ire1a          |
| <a href="#">SHC1</a>    | SHC adaptor protein 1 [Source:HGNC Symbol;Acc:HGNC:10840]                                  | 2691           | 0.432             | Yes             | Ire1a          |
| <a href="#">TPP1</a>    | tripeptidyl peptidase 1 [Source:HGNC Symbol;Acc:HGNC:2073]                                 | 2884           | 0.414             | Yes             | Ire1a          |
| <a href="#">HDGF</a>    | heparin binding growth factor [Source:HGNC Symbol;Acc:HGNC:4856]                           | 3235           | 0.386             | Yes             | Ire1a          |
| <a href="#">TLN1</a>    | talin 1 [Source:HGNC Symbol;Acc:HGNC:11845]                                                | 3264           | 0.384             | Yes             | Ire1a          |
| <a href="#">EXTL3</a>   | exostosin like glycosyltransferase 3 [Source:HGNC Symbol;Acc:HGNC:3518]                    | 3488           | 0.365             | Yes             | Ire1a          |
| <a href="#">TSPYL2</a>  | TSPY like 2 [Source:HGNC Symbol;Acc:HGNC:24358]                                            | 3680           | 0.350             | Yes             | Ire1a          |
| <a href="#">MBTPS1</a>  | membrane bound transcription factor peptidase, site 1 [Source:HGNC Symbol;Acc:HGNC:15456]  | 3996           | 0.327             | Yes             | Atf6           |
| <a href="#">PDIA5</a>   | protein disulfide isomerase family A member 5 [Source:HGNC Symbol;Acc:HGNC:24811]          | 4530           | 0.294             | Yes             | Ire1a          |
| <a href="#">DCTN1</a>   | dynactin subunit 1 [Source:HGNC Symbol;Acc:HGNC:2711]                                      | 4638           | 0.287             | Yes             | Ire1a          |
| <a href="#">DNAJC3</a>  | DnaJ heat shock protein family (Hsp40) member C3 [Source:HGNC Symbol;Acc:HGNC:9439]        | 4761           | 0.281             | Yes             | Ire1a          |



|                         |                                                                                    |      |       |     |       |
|-------------------------|------------------------------------------------------------------------------------|------|-------|-----|-------|
| <a href="#">SULT1A4</a> | sulfotransferase family 1A member 4<br>[Source:HGNC Symbol;Acc:HGNC:30004]         | 4938 | 0.272 | Yes | Ire1a |
| <a href="#">PARN</a>    | poly(A)-specific ribonuclease [Source:HGNC<br>Symbol;Acc:HGNC:8609]                | 5037 | 0.266 | Yes | Perk  |
| <a href="#">ADD1</a>    | adducin 1 [Source:HGNC<br>Symbol;Acc:HGNC:243]                                     | 5375 | 0.250 | Yes | Ire1a |
| <a href="#">ERN1</a>    | endoplasmic reticulum to nucleus signaling 1<br>[Source:HGNC Symbol;Acc:HGNC:3449] | 5411 | 0.248 | Yes | Ire1a |

1

2 **Supplementary Table 1. Primer sequences**

3

4 **Supplementary methods 1: histology and immunohistochemistry**

# Figure 1

A

H&E STAINING

SIRIUS RED STAINING

$\alpha$ SMA STAINING

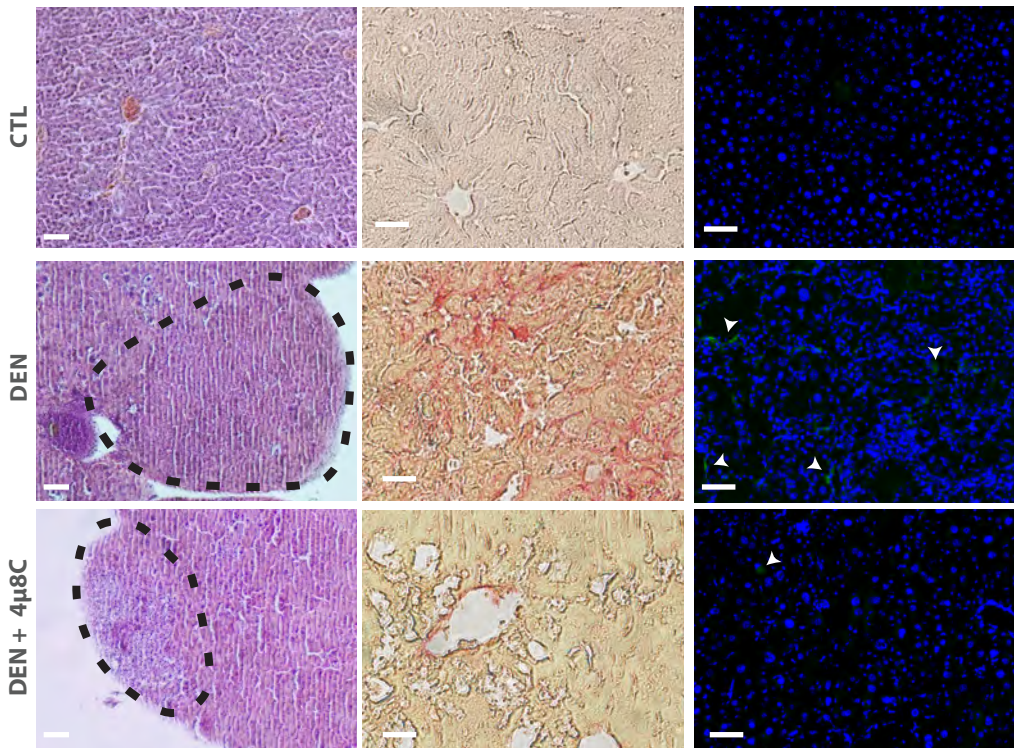

B

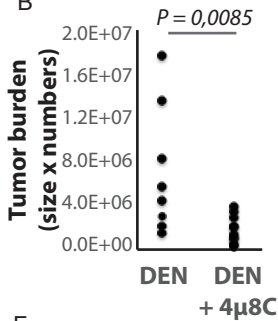

C

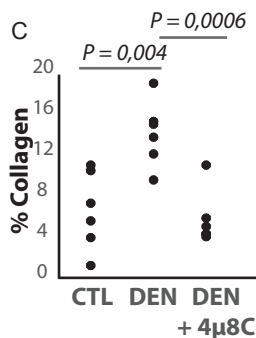

D

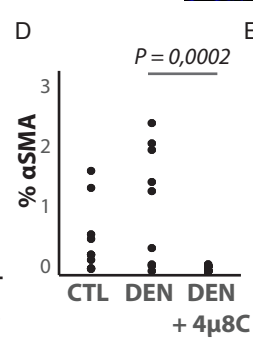

E

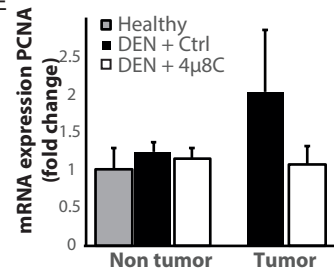

F

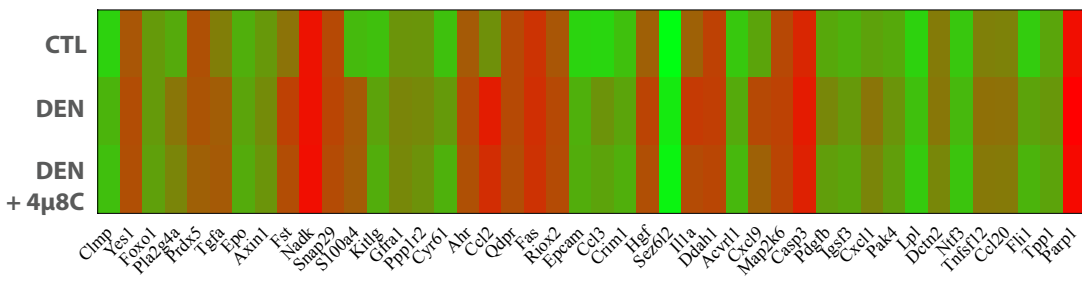

# Figure 2

A

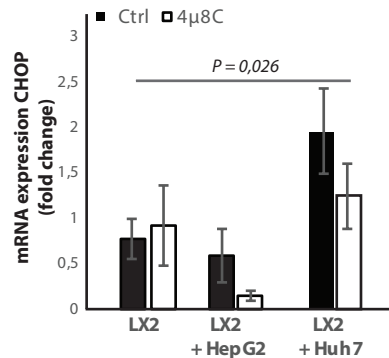

B

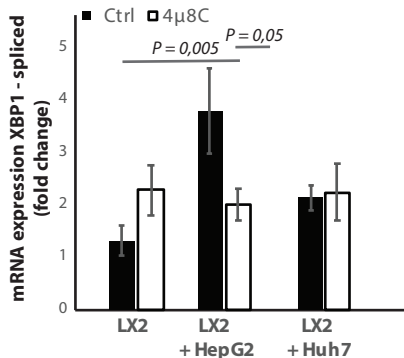

C

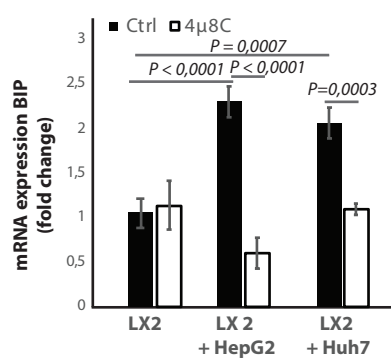

D

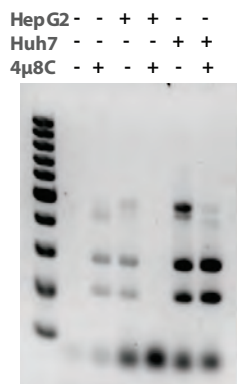

E

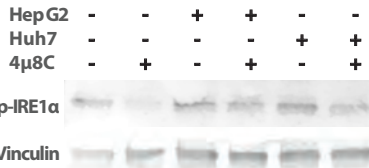

G

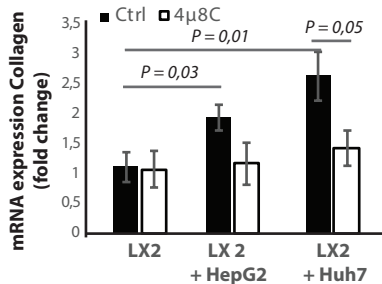

F

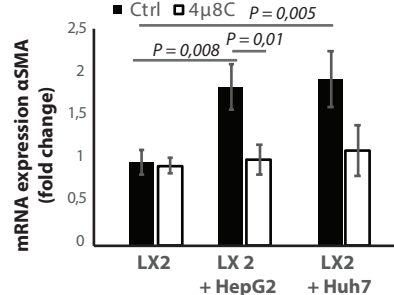

**Figure 3****A****H&E STAINING****SIRIUS RED STAINING**

LX2

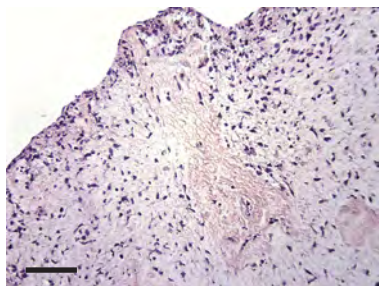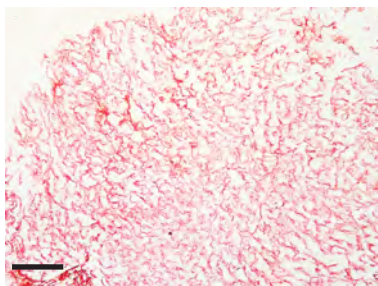

LX2 + HepG2

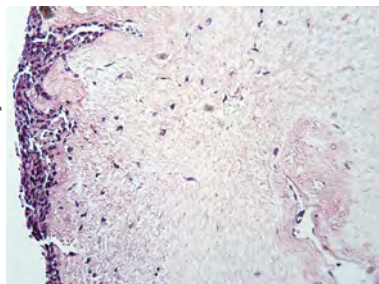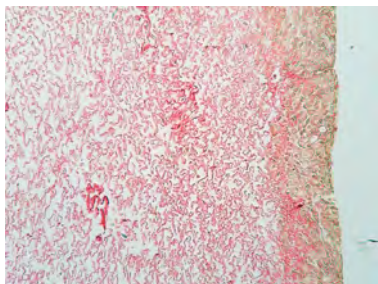

LX2 + HepG2 + 4μ8C

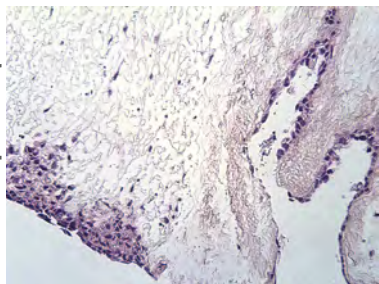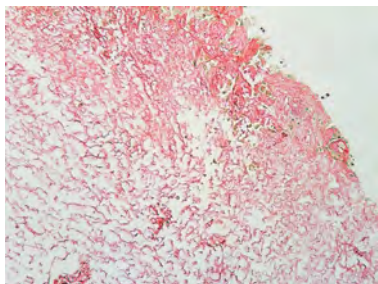**B**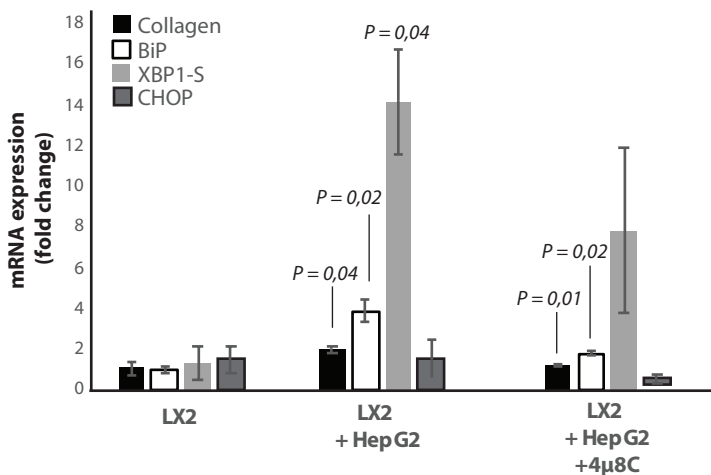

**Figure 4****A**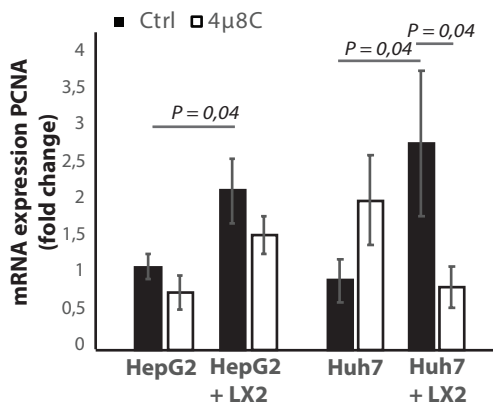**B**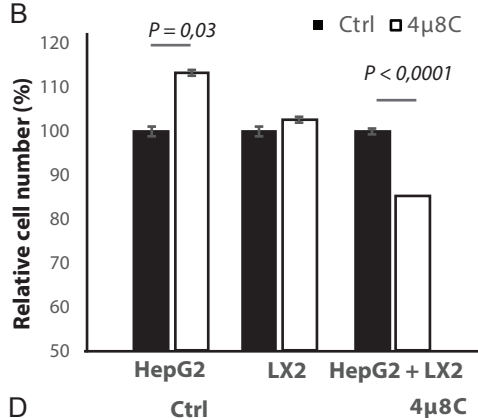**C**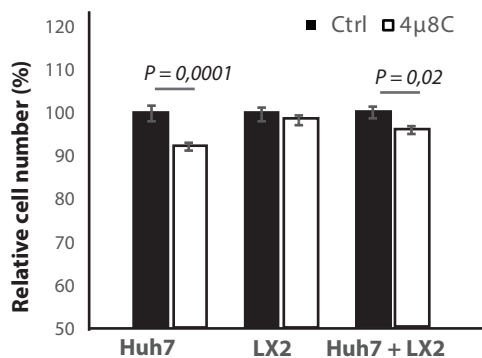**D**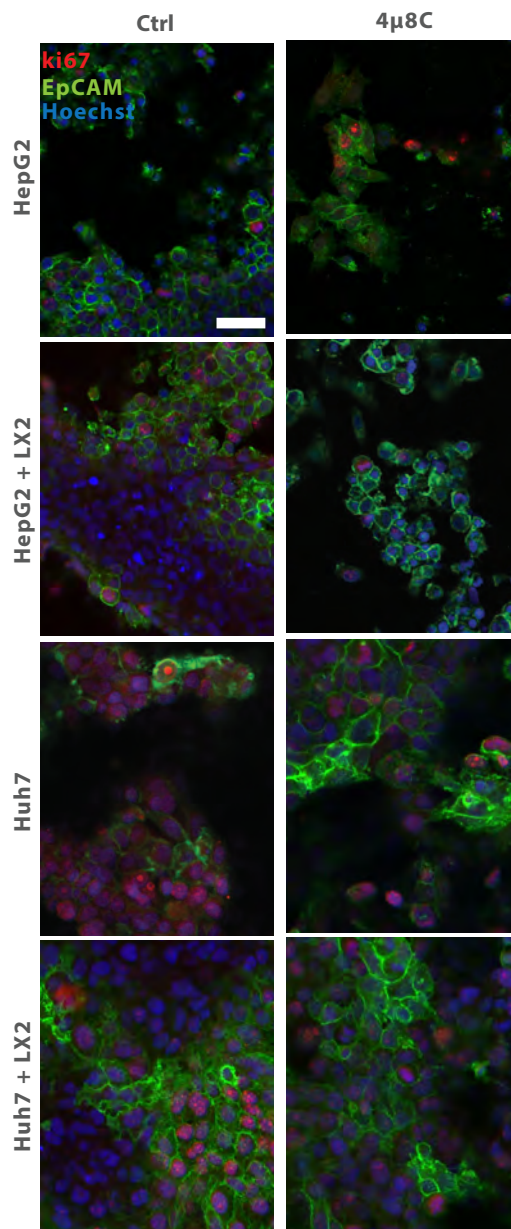**E**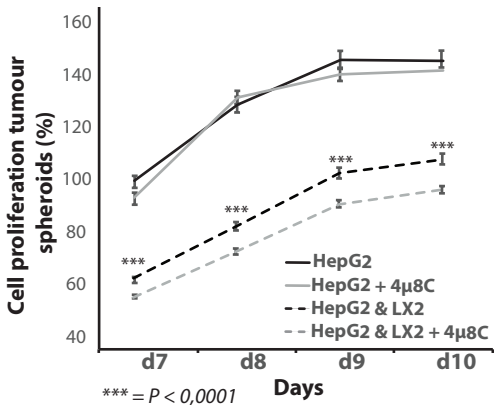**F**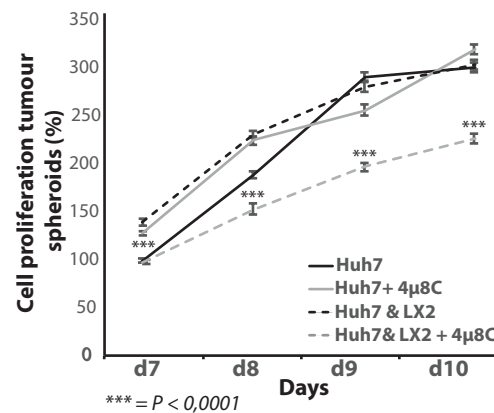



# Figure 5

A

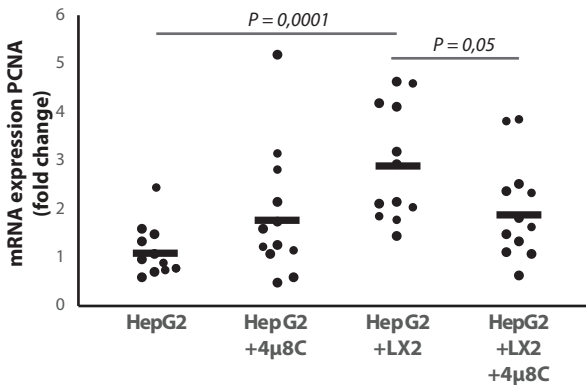

B

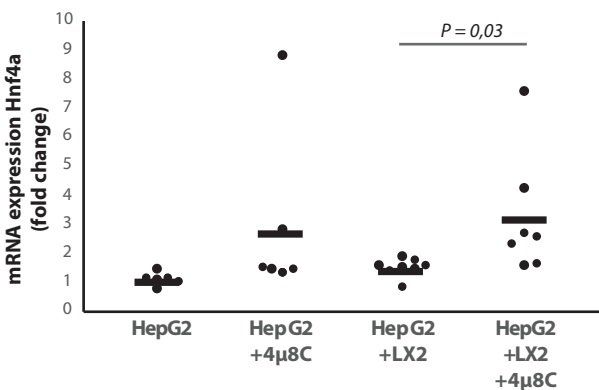

C

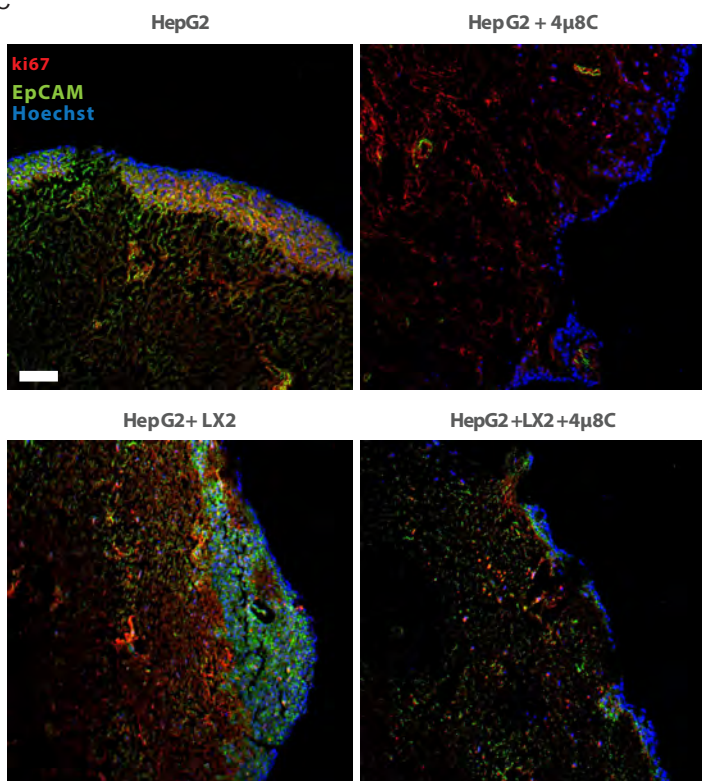

# Figure 6

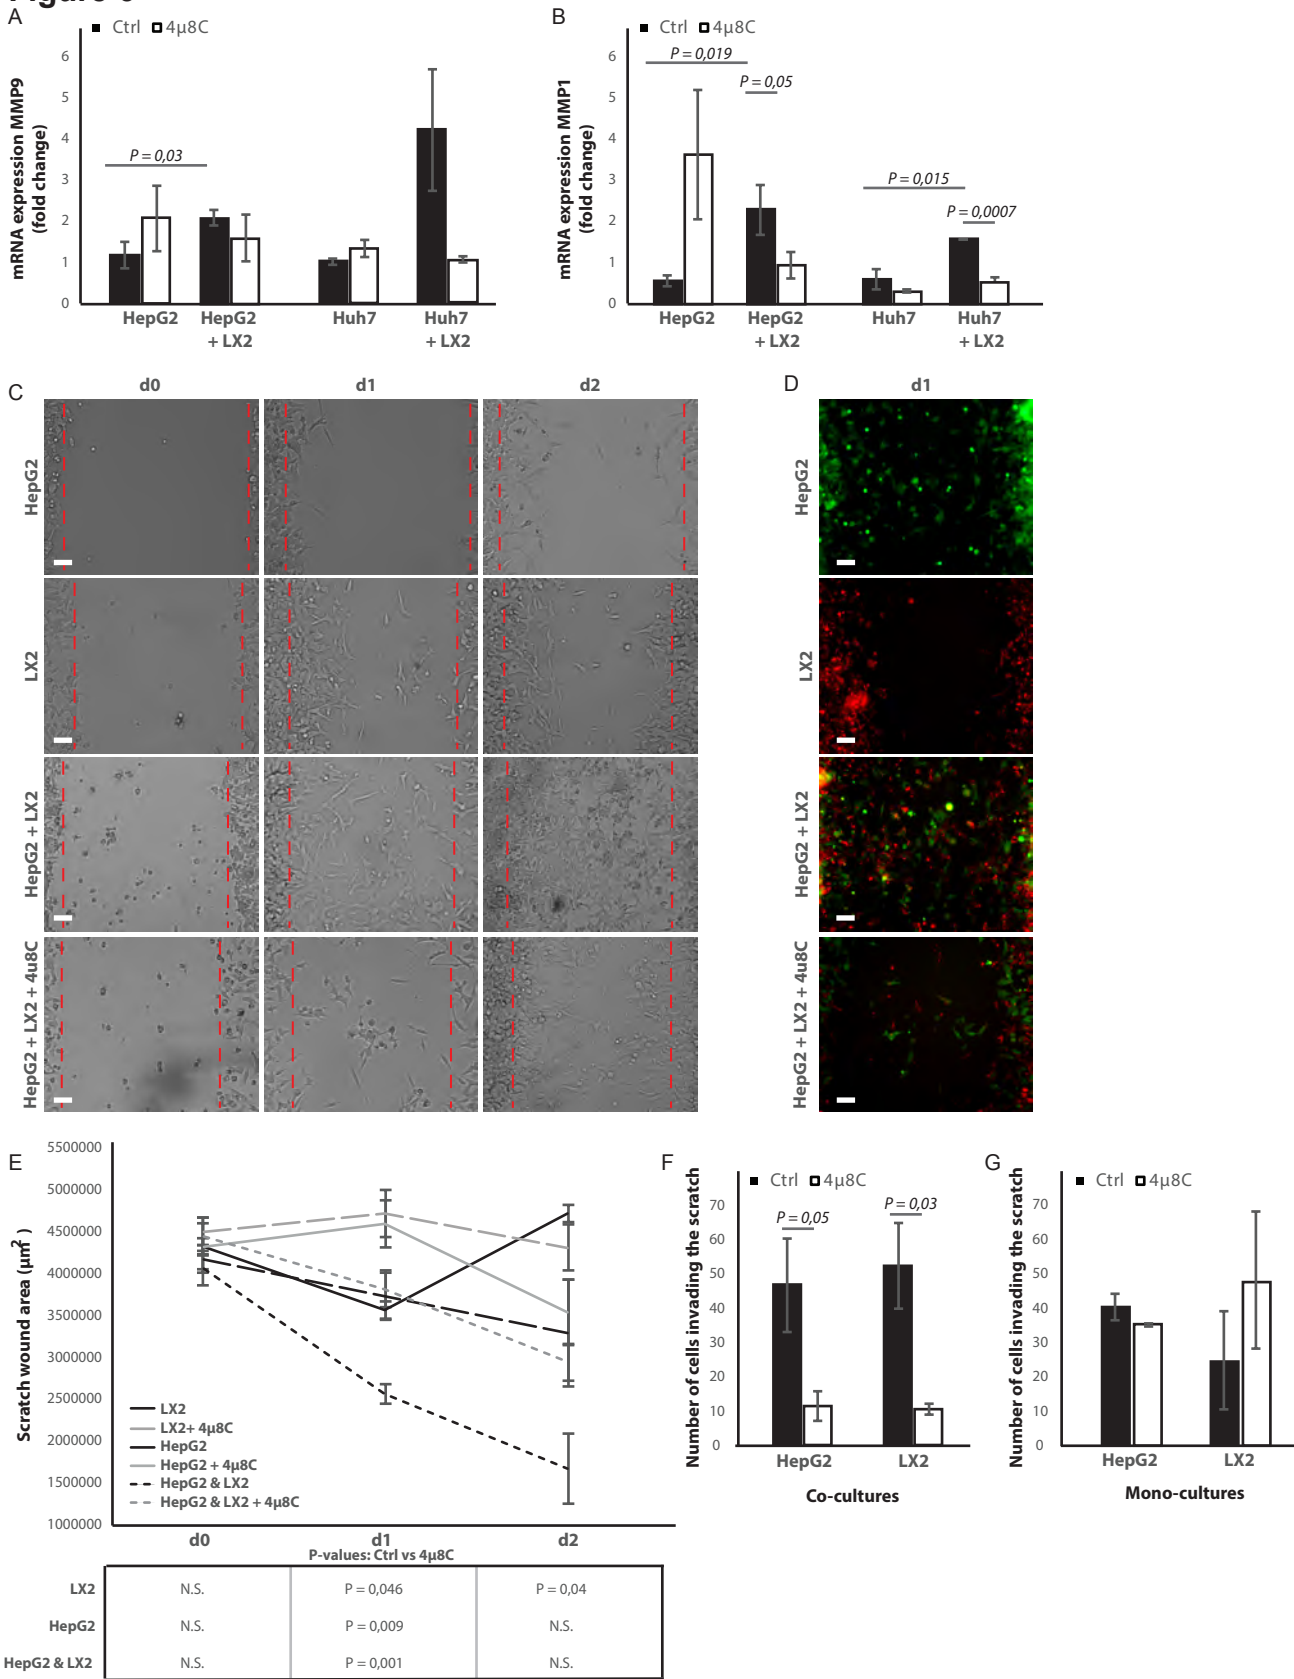

# Figure 7

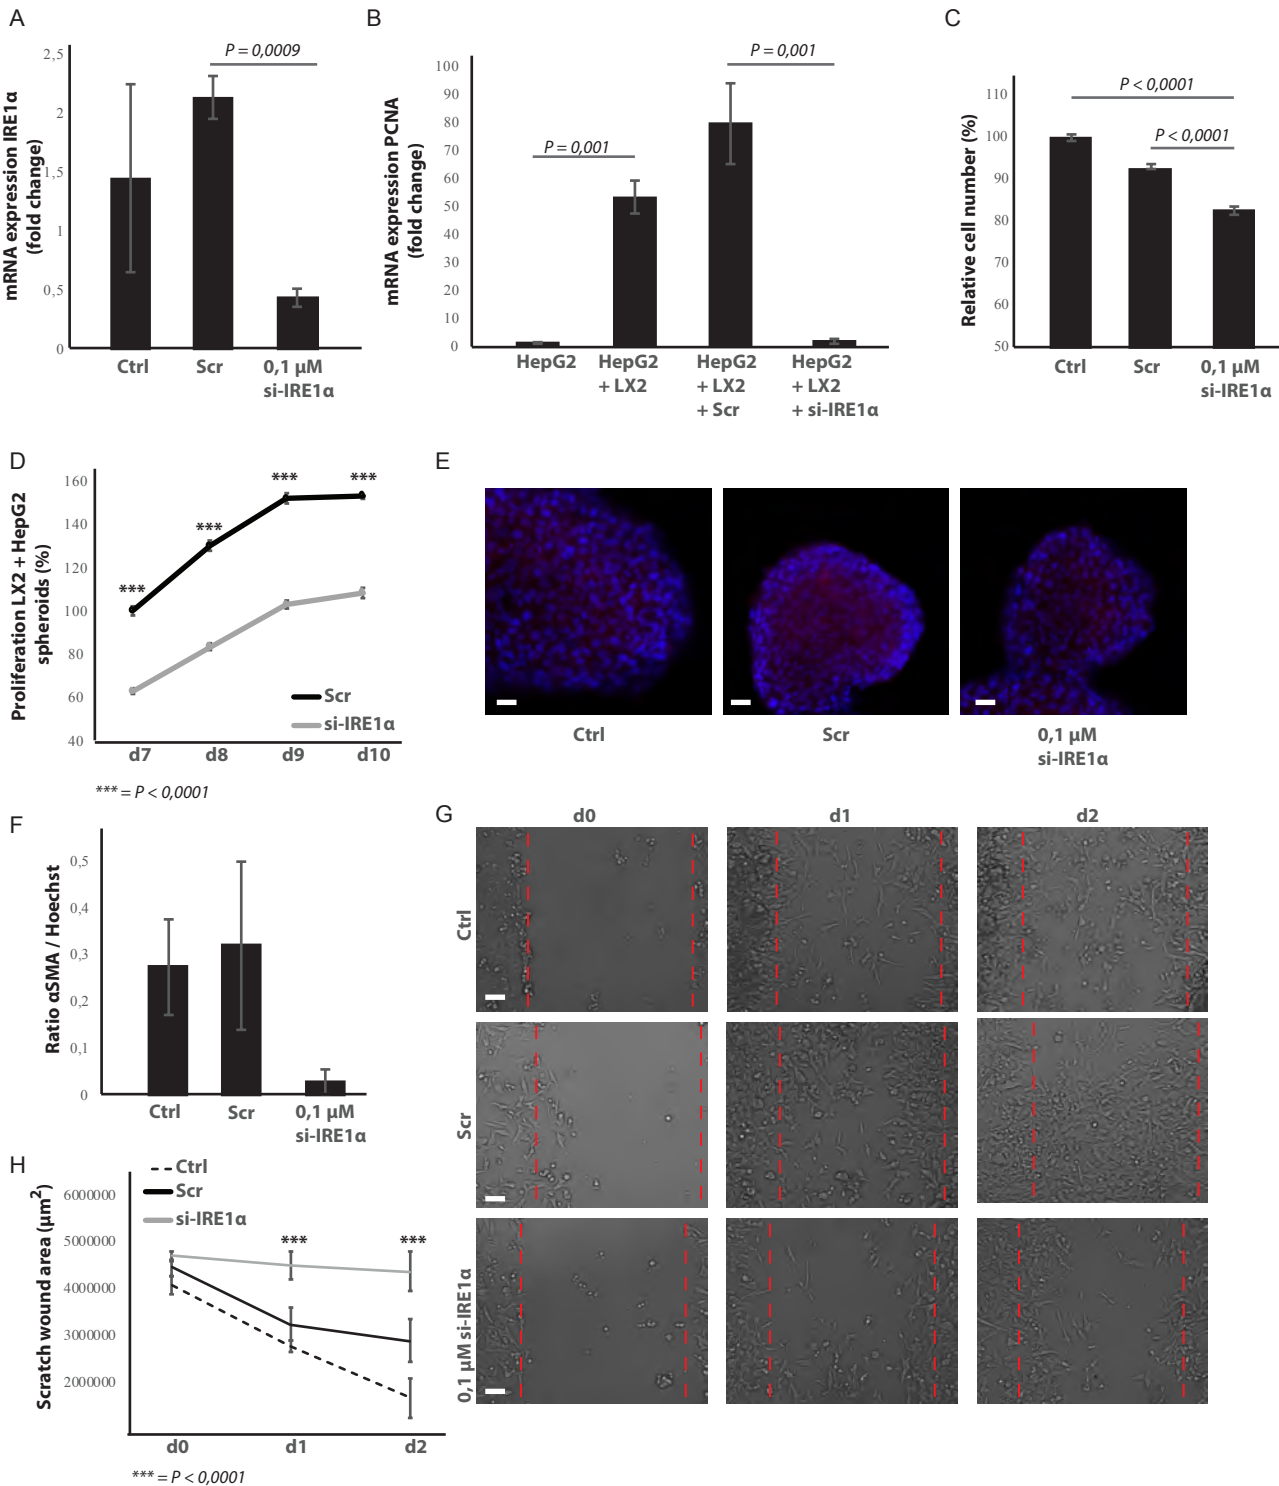

Source: https://www.biorxiv.org/content/10.1101/826453v3.full.pdf
